# Supplementary material for: Machine learning the peak emission wavelength of Mn4+-activated inorganic phosphors
Source: Royal Society of Chemistry journal article supplement (doi:10.1039/d3nj01602a), 2023-01-01
Supplement: d3nj01602a1.pdf [file d3nj01602a1.pdf]

**Fig. S1.** The model performance as a function of the number of features, evaluated by (a)  $R^2$ , (b) MAE, and (c) RMSE. These analysis schemes were obtained from leave-one-out cross-validation, and the model performance was examined using a range of 12-112 features in increments of 20 features. With the increase of the number of features, the model is gradually over-fitted.

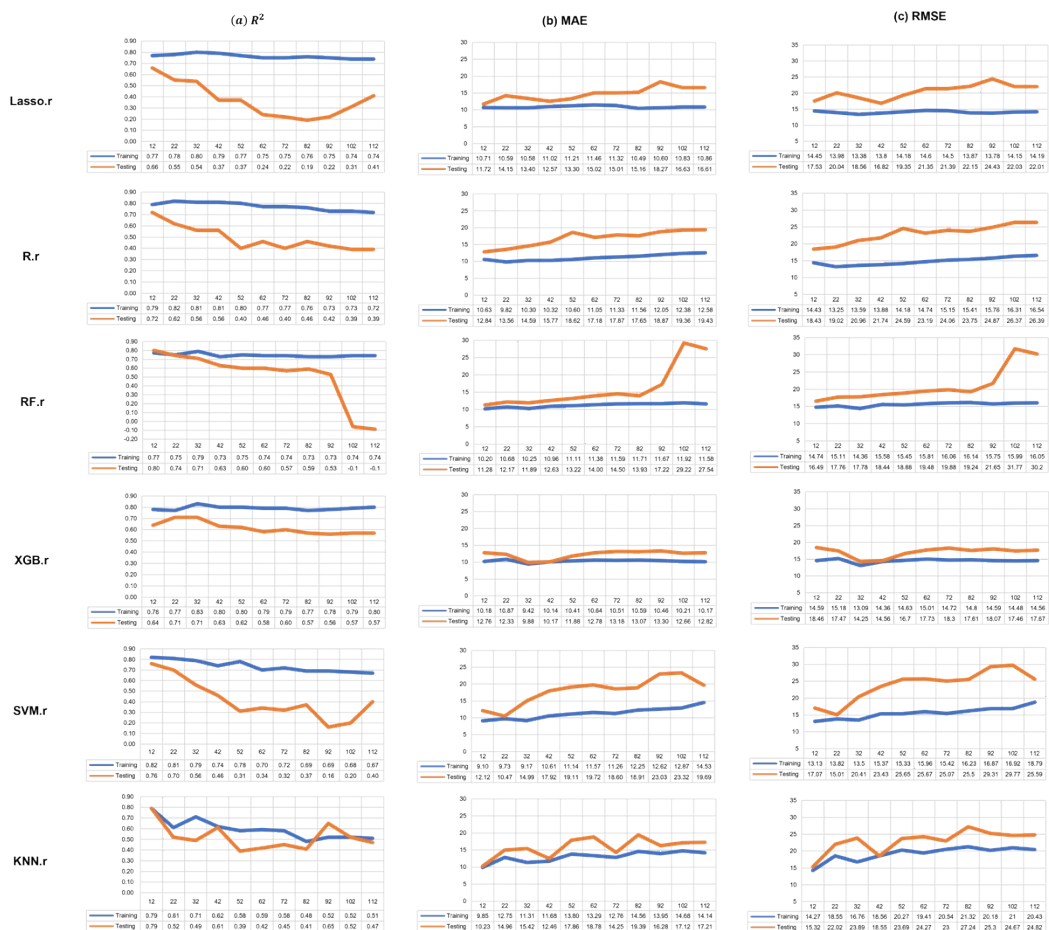

Fig. S2. XRD patterns of (a)  $\text{Ba}_2\text{LaNbO}_6: 0.003\text{Mn}^{4+}$ , (b)  $\text{Ba}_2\text{YNbO}_6: 0.005\text{Mn}^{4+}$ , (c)  $\text{Sr}_2\text{LaSbO}_6: 0.008\text{Mn}^{4+}$ , and (d)  $\text{Mg}_2\text{TiO}_4: 0.004\text{Mn}^{4+}$ . Above: standard pattern. Below: experimental data.

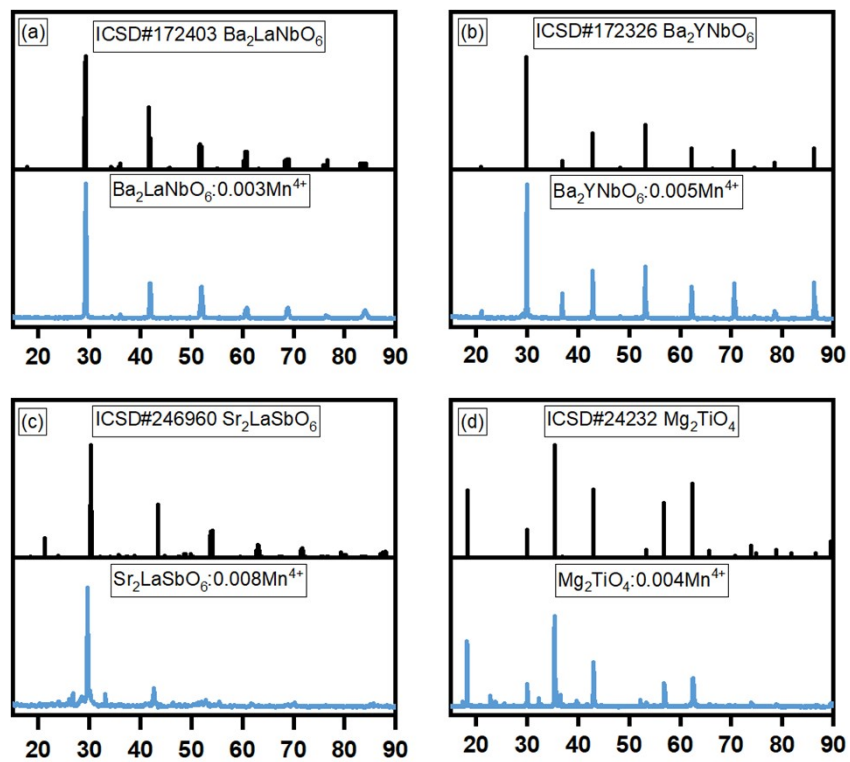

Fig. S3. photoluminescence excitation (PLE) and photoluminescence (PL) spectrum of (a)  $\text{Ba}_2\text{LaNbO}_6: 0.003\text{Mn}^{4+}$ , (b)  $\text{Ba}_2\text{YNbO}_6: 0.005\text{Mn}^{4+}$ , (c)  $\text{Sr}_2\text{LaSbO}_6: 0.008\text{Mn}^{4+}$ , and (d)  $\text{Mg}_2\text{TiO}_4: 0.004\text{Mn}^{4+}$ .

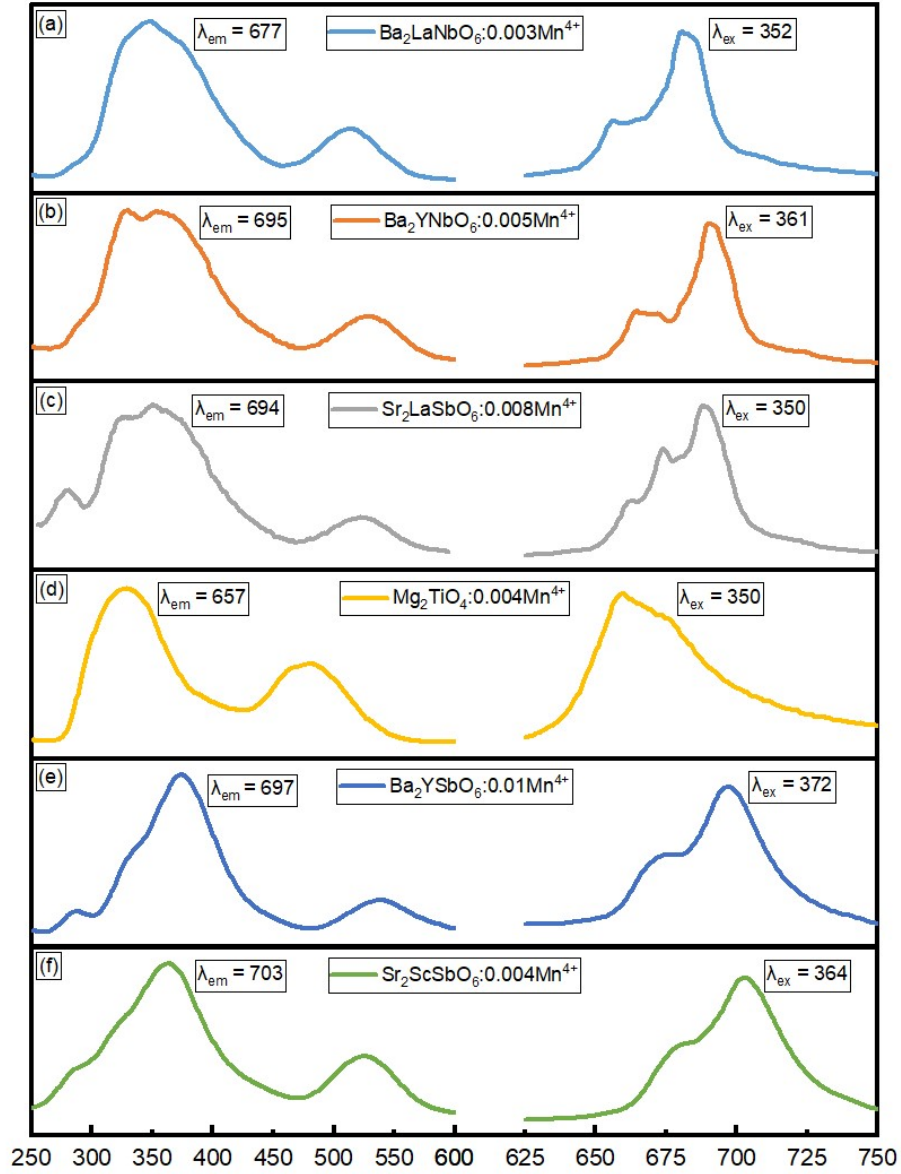

**Table S1. Training labels.**

| Composition                                                       | Wavelength (nm) | Composition                                        | Wavelength (nm) |
|-------------------------------------------------------------------|-----------------|----------------------------------------------------|-----------------|
| (NH <sub>4</sub> ) <sub>2</sub> NaInF <sub>6</sub>                | 631             | Ca <sub>2</sub> ScSbO <sub>6</sub>                 | 693             |
| (NH <sub>4</sub> ) <sub>2</sub> SiF <sub>6</sub>                  | 630             | Ca <sub>2</sub> WO <sub>2</sub> F <sub>4</sub>     | 632             |
| (NH <sub>4</sub> ) <sub>2</sub> SnF <sub>6</sub>                  | 630             | CaMg <sub>2</sub> Al <sub>16</sub> O <sub>27</sub> | 655             |
| (NH <sub>4</sub> ) <sub>2</sub> TiF <sub>6</sub>                  | 630             | CaMg <sub>2</sub> Al <sub>16</sub> O <sub>27</sub> | 655             |
| Ba <sub>2</sub> CaWO <sub>6</sub>                                 | 680             | Cs <sub>2</sub> GeF <sub>6</sub>                   | 633             |
| Ba <sub>2</sub> GdNbO <sub>6</sub>                                | 676             | Cs <sub>2</sub> HfF <sub>6</sub>                   | 630             |
| Ba <sub>2</sub> LaNbO <sub>6</sub>                                | 685             | Cs <sub>2</sub> KCrF <sub>6</sub>                  | 632             |
| Ba <sub>2</sub> LaSbO <sub>6</sub>                                | 678             | Cs <sub>2</sub> NaAl <sub>3</sub> F <sub>12</sub>  | 633             |
| Ba <sub>2</sub> LuNbO <sub>6</sub>                                | 698             | Cs <sub>2</sub> SiF <sub>6</sub>                   | 632             |
| Ba <sub>2</sub> LuTaO <sub>6</sub>                                | 700             | Cs <sub>2</sub> ZrF <sub>6</sub>                   | 633             |
| Ba <sub>2</sub> MgWO <sub>6</sub>                                 | 720             | CsMoO <sub>2</sub> F <sub>3</sub>                  | 633             |
| Ba <sub>2</sub> MgWO <sub>6</sub>                                 | 725             | Gd <sub>2</sub> ZnTiO <sub>6</sub>                 | 705             |
| Ba <sub>2</sub> YNbO <sub>6</sub>                                 | 695             | Gd <sub>2</sub> ZnTiO <sub>6</sub>                 | 705             |
| Ba <sub>2</sub> YTaO <sub>6</sub>                                 | 690             | K <sub>2</sub> BaGe <sub>8</sub> O <sub>18</sub>   | 666             |
| BaGe <sub>4</sub> O <sub>9</sub>                                  | 666             | K <sub>2</sub> GeF <sub>6</sub>                    | 635             |
| BaGeF <sub>6</sub>                                                | 634             | K <sub>2</sub> LiAlF <sub>6</sub>                  | 635             |
| BaLaMgNbO <sub>6</sub>                                            | 700             | K <sub>2</sub> NaInF <sub>6</sub>                  | 631             |
| BaLaZnTaO <sub>6</sub>                                            | 695             | K <sub>2</sub> SiF <sub>6</sub>                    | 632             |
| BaSn(PO <sub>4</sub> ) <sub>2</sub>                               | 660             | K <sub>2</sub> TiF <sub>6</sub>                    | 632             |
| BaSnF <sub>6</sub>                                                | 631             | K <sub>3</sub> AlF <sub>6</sub>                    | 628             |
| BaTiF <sub>6</sub>                                                | 632             | KGaP <sub>2</sub> O <sub>7</sub>                   | 702             |
| BaTiOF <sub>4</sub>                                               | 631             | KNaSiF <sub>6</sub>                                | 630             |
| BaZn <sub>1.06</sub> Al <sub>9.94</sub> O <sub>17</sub>           | 665             | KZnF <sub>3</sub>                                  | 636             |
| Ca <sub>14</sub> Al <sub>10</sub> Zn <sub>6</sub> O <sub>35</sub> | 710             | La(MgTiO <sub>6</sub> ) <sub>0.5</sub>             | 708             |
| Ca <sub>14</sub> Zn <sub>6</sub> Ga <sub>10</sub> O <sub>35</sub> | 711             | La <sub>2</sub> ZnTiO <sub>6</sub>                 | 708             |
| Ca <sub>2</sub> AlNbO <sub>6</sub>                                | 712             | La <sub>3</sub> GaGe <sub>5</sub> O <sub>16</sub>  | 659             |
| Ca <sub>2</sub> InSbO <sub>6</sub>                                | 693             | LaAlO <sub>3</sub>                                 | 731             |
| Ca <sub>2</sub> LaSbO <sub>6</sub>                                | 680             | LaScO <sub>3</sub>                                 | 703             |

| <b>Composition</b>                                 | <b>Wavelength (nm)</b> | <b>Composition</b>                                               | <b>Wavelength (nm)</b> |
|----------------------------------------------------|------------------------|------------------------------------------------------------------|------------------------|
| $\text{Ca}_2\text{LaTaO}_6$                        | 696                    | $\text{LaSrZnNbO}_6$                                             | 694                    |
| $\text{Ca}_2\text{MgWO}_6$                         | 690                    | $\text{LaSrZnSbO}_6$                                             | 706                    |
| $\text{Ca}_2\text{MgWO}_6$                         | 700                    | $\text{LaTiSbO}_6$                                               | 685                    |
| $\text{Li}_2\text{MgZrO}_4$                        | 670                    | $\text{LiSrAlF}_6$                                               | 618                    |
| $\text{Li}_2\text{SnO}_3$                          | 658                    | $\text{Mg}_7\text{Ga}_2\text{GeO}_{12}$                          | 660                    |
| $\text{Li}_2\text{ZnTi}_3\text{O}_8$               | 681                    | $\text{Na}_{1.57}\text{Zn}_{0.57}\text{Al}_{10.43}\text{O}_{17}$ | 695                    |
| $\text{Li}_3\text{Mg}_2\text{NbO}_6$               | 668                    | $\text{Na}_2\text{GeF}_6$                                        | 620                    |
| $\text{Li}_5\text{La}_3\text{Nb}_2\text{O}_{12}$   | 715                    | $\text{Na}_2\text{MgAl}_{10}\text{O}_{17}$                       | 695                    |
| $\text{Li}_5\text{La}_3\text{Ta}_2\text{O}_{12}$   | 714                    | $\text{Na}_2\text{NbF}_5\text{O}$                                | 620                    |
| $\text{Li}_6\text{SrLa}_2\text{Sb}_2\text{O}_{12}$ | 705                    | $\text{Na}_2\text{SiF}_6$                                        | 620                    |
| $\text{LiLa}_2\text{SbO}_6$                        | 725                    | $\text{Na}_3\text{AlF}_6$                                        | 628                    |

**Table S2. The prediction results (nm) of each model to the prediction set.**

| <b>Composition</b>                                                       | <b>XGB.r</b> | <b>RF.r</b> | <b>Lasso.r</b> | <b>R.r</b> | <b>KNN.r</b> | <b>SVM.r</b> |
|--------------------------------------------------------------------------|--------------|-------------|----------------|------------|--------------|--------------|
| (GdNa) <sub>0.5</sub> TiO <sub>3</sub>                                   | 642          | 666         | 685            | 689        | 688          | 688          |
| (Na <sub>2</sub> Mg)Si(SiO <sub>4</sub> ) <sub>3</sub>                   | 647          | 669         | 656            | 663        | 671          | 681          |
| (NH <sub>4</sub> ) <sub>3</sub> GeF <sub>7</sub>                         | 641          | 627         | 612            | 606        | 632          | 606          |
| (NH <sub>4</sub> ) <sub>3</sub> InF <sub>6</sub>                         | 629          | 646         | 630            | 631        | 642          | 618          |
| (NH <sub>4</sub> ) <sub>3</sub> SnF <sub>7</sub>                         | 641          | 627         | 613            | 607        | 632          | 601          |
| Ba <sub>0.82</sub> Mg <sub>.63</sub> Al <sub>10.37</sub> O <sub>17</sub> | 679          | 672         | 684            | 688        | 675          | 678          |
| Ba <sub>2</sub> GdNbO <sub>6</sub>                                       | 696          | 696         | 713            | 717        | 697          | 707          |
| Ba <sub>2</sub> GdSbO <sub>6</sub>                                       | 681          | 698         | 716            | 720        | 704          | 657          |
| Ba <sub>2</sub> LaNbO <sub>6</sub>                                       | 701          | 691         | 708            | 710        | 696          | 710          |
| Ba <sub>2</sub> LuNbO <sub>6</sub>                                       | 696          | 699         | 715            | 716        | 696          | 709          |
| Ba <sub>2</sub> NaNb <sub>5</sub> O <sub>15</sub>                        | 669          | 674         | 681            | 678        | 682          | 667          |
| Ba <sub>2</sub> Nb <sub>15</sub> O <sub>32</sub>                         | 671          | 663         | 687            | 685        | 659          | 674          |
| Ba <sub>2</sub> Nb <sub>5</sub> O <sub>9</sub>                           | 696          | 695         | 704            | 703        | 694          | 709          |
| Ba <sub>2</sub> SnO <sub>4</sub>                                         | 707          | 692         | 704            | 703        | 696          | 697          |
| Ba <sub>2</sub> SrWO <sub>6</sub>                                        | 700          | 701         | 714            | 717        | 716          | 704          |
| Ba <sub>2</sub> TiZrO <sub>6</sub>                                       | 695          | 701         | 713            | 718        | 682          | 703          |
| Ba <sub>2</sub> YNbO <sub>6</sub>                                        | 702          | 696         | 704            | 707        | 694          | 709          |
| Ba <sub>3</sub> Al <sub>2</sub> Si <sub>3</sub> O <sub>12</sub>          | 707          | 682         | 684            | 681        | 661          | 688          |
| Ba <sub>3</sub> CaSb <sub>2</sub> O <sub>9</sub>                         | 704          | 693         | 700            | 704        | 692          | 688          |
| Ba <sub>3</sub> LaNb <sub>3</sub> O <sub>12</sub>                        | 694          | 693         | 706            | 706        | 693          | 700          |
| Ba <sub>3</sub> MgNb <sub>2</sub> O <sub>9</sub>                         | 696          | 697         | 708            | 712        | 698          | 707          |
| Ba <sub>3</sub> MgSb <sub>2</sub> O <sub>9</sub>                         | 696          | 695         | 710            | 714        | 701          | 699          |
| Ba <sub>3</sub> MgTa <sub>2</sub> O <sub>9</sub>                         | 692          | 702         | 723            | 726        | 716          | 706          |
| Ba <sub>3</sub> NaNbO <sub>6</sub>                                       | 703          | 694         | 693            | 692        | 691          | 700          |
| Ba <sub>3</sub> NaSbO <sub>6</sub>                                       | 703          | 694         | 695            | 695        | 691          | 699          |
| Ba <sub>3</sub> NaTaO <sub>6</sub>                                       | 701          | 694         | 701            | 700        | 692          | 696          |
| Ba <sub>3</sub> Nb <sub>6</sub> Si <sub>4</sub> O <sub>26</sub>          | 660          | 663         | 678            | 678        | 687          | 672          |
| Ba <sub>3</sub> SrSb <sub>2</sub> O <sub>9</sub>                         | 698          | 694         | 705            | 707        | 696          | 692          |
| Ba <sub>3</sub> Ta <sub>6</sub> Si <sub>4</sub> O <sub>26</sub>          | 670          | 678         | 696            | 693        | 694          | 679          |
| Ba <sub>3</sub> ZnTa <sub>2</sub> O <sub>9</sub>                         | 695          | 701         | 726            | 728        | 715          | 709          |
| Ba <sub>4</sub> Na <sub>2</sub> W <sub>2</sub> O <sub>11</sub>           | 688          | 695         | 709            | 706        | 716          | 694          |
| Ba <sub>4</sub> NaSb <sub>3</sub> O <sub>12</sub>                        | 678          | 681         | 670            | 673        | 683          | 677          |
| Ba <sub>4</sub> Sn <sub>2</sub> Y <sub>2</sub> O <sub>11</sub>           | 698          | 698         | 710            | 713        | 690          | 703          |
| Ba <sub>5</sub> Li <sub>2</sub> W <sub>3</sub> O <sub>15</sub>           | 685          | 686         | 709            | 704        | 713          | 691          |
| Ba <sub>5</sub> W <sub>3.04</sub> Li <sub>0.96</sub> O <sub>14.6</sub>   | 702          | 695         | 710            | 706        | 716          | 695          |
| Ba <sub>6</sub> Nb <sub>14</sub> Si <sub>4</sub> O <sub>47</sub>         | 670          | 664         | 681            | 672        | 660          | 656          |
| Ba <sub>9</sub> Sc <sub>2</sub> Si <sub>6</sub> O <sub>24</sub>          | 711          | 687         | 686            | 684        | 661          | 684          |
| BaAl <sub>12</sub> O <sub>19</sub>                                       | 685          | 691         | 691            | 691        | 697          | 693          |
| BaGeF <sub>6</sub>                                                       | 629          | 631         | 632            | 624        | 632          | 632          |
| BaLa <sub>2</sub> Sc <sub>2</sub> O <sub>7</sub>                         | 697          | 697         | 705            | 707        | 703          | 711          |
| BaNb <sub>10</sub> SiO <sub>19</sub>                                     | 672          | 669         | 693            | 685        | 683          | 673          |
| BaNb <sub>2</sub> O <sub>6</sub>                                         | 676          | 666         | 680            | 678        | 659          | 669          |
| BaNbO <sub>3</sub>                                                       | 715          | 695         | 706            | 705        | 695          | 706          |
| BaSi <sub>4</sub> O <sub>9</sub>                                         | 645          | 649         | 668            | 671        | 672          | 675          |

| <b>Composition</b>                                              | <b>XGB.r</b> | <b>RF.r</b> | <b>Lasso.r</b> | <b>R.r</b> | <b>KNN.r</b> | <b>SVM.r</b> |
|-----------------------------------------------------------------|--------------|-------------|----------------|------------|--------------|--------------|
| BaSnO <sub>3</sub>                                              | 709          | 695         | 707            | 706        | 696          | 700          |
| BaSnSi <sub>3</sub> O <sub>9</sub>                              | 645          | 657         | 677            | 677        | 669          | 669          |
| BaTi <sub>7</sub> MgO <sub>16</sub>                             | 668          | 683         | 684            | 690        | 680          | 685          |
| BaTiF <sub>6</sub>                                              | 641          | 630         | 627            | 618        | 632          | 628          |
| BaTiSi <sub>3</sub> O <sub>9</sub>                              | 658          | 660         | 674            | 674        | 682          | 674          |
| BaY <sub>2</sub> SbO <sub>6</sub>                               | 707          | 692         | 707            | 710        | 694          | 708          |
| BaZrO <sub>3</sub>                                              | 705          | 694         | 701            | 699        | 696          | 697          |
| Ca(TiO)(SiO <sub>4</sub> )                                      | 650          | 671         | 660            | 659        | 668          | 671          |
| Ca <sub>0.5</sub> TaO <sub>3</sub>                              | 689          | 695         | 696            | 693        | 700          | 689          |
| Ca <sub>2</sub> Gd <sub>3</sub> Sb <sub>3</sub> O <sub>14</sub> | 661          | 686         | 667            | 674        | 682          | 682          |
| Ca <sub>2</sub> La <sub>3</sub> Sb <sub>3</sub> O <sub>14</sub> | 683          | 688         | 687            | 689        | 686          | 700          |
| Ca <sub>2</sub> LaSbO <sub>6</sub>                              | 706          | 692         | 686            | 688        | 689          | 693          |
| Ca <sub>2</sub> LuNbO <sub>6</sub>                              | 703          | 696         | 692            | 694        | 693          | 705          |
| Ca <sub>2</sub> Nb <sub>2</sub> O <sub>7</sub>                  | 686          | 661         | 656            | 650        | 657          | 642          |
| Ca <sub>2</sub> Sb <sub>2</sub> O <sub>7</sub>                  | 689          | 670         | 668            | 665        | 659          | 664          |
| Ca <sub>2</sub> Y <sub>3</sub> Sb <sub>3</sub> O <sub>14</sub>  | 683          | 692         | 685            | 688        | 691          | 699          |
| Ca <sub>2</sub> ZrSi <sub>4</sub> O <sub>12</sub>               | 641          | 663         | 648            | 647        | 668          | 654          |
| Ca <sub>3</sub> Al <sub>2</sub> O <sub>6</sub>                  | 683          | 662         | 657            | 657        | 672          | 675          |
| Ca <sub>3</sub> Al <sub>2</sub> Si <sub>3</sub> O <sub>12</sub> | 688          | 675         | 656            | 655        | 667          | 674          |
| Ca <sub>3</sub> Ga <sub>2</sub> Ge <sub>4</sub> O <sub>14</sub> | 663          | 679         | 674            | 678        | 676          | 675          |
| Ca <sub>3</sub> Ga <sub>2</sub> Si <sub>3</sub> O <sub>12</sub> | 676          | 676         | 661            | 659        | 669          | 674          |
| Ca <sub>3</sub> Sc <sub>2</sub> Si <sub>3</sub> O <sub>12</sub> | 685          | 675         | 656            | 654        | 667          | 673          |
| Ca <sub>3</sub> SnSi <sub>2</sub> O <sub>9</sub>                | 686          | 671         | 660            | 659        | 668          | 656          |
| Ca <sub>3</sub> WO <sub>6</sub>                                 | 703          | 677         | 678            | 676        | 687          | 675          |
| CaMg <sub>2</sub> Al <sub>6</sub> O <sub>12</sub>               | 683          | 683         | 673            | 677        | 669          | 688          |
| CaNb <sub>2</sub> O <sub>6</sub>                                | 667          | 662         | 669            | 669        | 696          | 669          |
| CaNbO <sub>3</sub>                                              | 706          | 668         | 669            | 669        | 671          | 676          |
| CaSc <sub>2</sub> O <sub>4</sub>                                | 664          | 658         | 656            | 654        | 654          | 651          |
| CaSi <sub>2</sub> O <sub>5</sub>                                | 655          | 653         | 653            | 655        | 694          | 669          |
| CaSiO <sub>3</sub>                                              | 689          | 671         | 673            | 673        | 701          | 685          |
| CaSnO <sub>3</sub>                                              | 714          | 678         | 676            | 675        | 699          | 676          |
| CaTiGeO <sub>5</sub>                                            | 661          | 672         | 668            | 667        | 667          | 683          |
| CaYAlO <sub>4</sub>                                             | 674          | 697         | 685            | 688        | 702          | 705          |
| CaZr <sub>4</sub> O <sub>9</sub>                                | 686          | 675         | 666            | 662        | 659          | 651          |
| CaZrGeO <sub>5</sub>                                            | 663          | 673         | 669            | 666        | 677          | 673          |
| CaZrO <sub>3</sub>                                              | 704          | 672         | 674            | 673        | 702          | 680          |
| Cs <sub>2</sub> GeF <sub>6</sub>                                | 639          | 630         | 623            | 615        | 632          | 623          |
| Cs <sub>2</sub> KTiF <sub>6</sub>                               | 633          | 638         | 637            | 639        | 631          | 623          |
| Cs <sub>2</sub> NaInF <sub>6</sub>                              | 631          | 636         | 618            | 622        | 626          | 599          |
| Cs <sub>2</sub> NaScF <sub>6</sub>                              | 632          | 637         | 613            | 616        | 626          | 601          |
| Cs <sub>2</sub> NaTiF <sub>6</sub>                              | 634          | 636         | 641            | 641        | 631          | 621          |
| Cs <sub>2</sub> Nb <sub>4</sub> O <sub>11</sub>                 | 665          | 654         | 649            | 645        | 648          | 647          |
| CsSbTeO <sub>6</sub>                                            | 687          | 665         | 690            | 686        | 695          | 683          |
| CsTiF <sub>4</sub>                                              | 640          | 630         | 629            | 619        | 632          | 624          |
| K(SbO)(SiO <sub>4</sub> )                                       | 658          | 659         | 663            | 660        | 689          | 664          |

| <b>Composition</b>                                              | <b>XGB.r</b> | <b>RF.r</b> | <b>Lasso.r</b> | <b>R.r</b> | <b>KNN.r</b> | <b>SVM.r</b> |
|-----------------------------------------------------------------|--------------|-------------|----------------|------------|--------------|--------------|
| K <sub>1.58</sub> Al <sub>11</sub> O <sub>17</sub>              | 694          | 663         | 658            | 657        | 666          | 656          |
| K <sub>2</sub> BaGe <sub>8</sub> O <sub>18</sub>                | 639          | 659         | 665            | 664        | 661          | 656          |
| K <sub>2</sub> Ge <sub>4</sub> O <sub>9</sub>                   | 658          | 652         | 654            | 653        | 657          | 653          |
| K <sub>2</sub> GeSi <sub>6</sub> O <sub>15</sub>                | 630          | 656         | 651            | 652        | 670          | 658          |
| K <sub>2</sub> LaTa <sub>5</sub> O <sub>15</sub>                | 678          | 693         | 694            | 692        | 690          | 683          |
| K <sub>2</sub> LiAlF <sub>6</sub>                               | 633          | 636         | 604            | 607        | 632          | 607          |
| K <sub>2</sub> NaAlF <sub>6</sub>                               | 633          | 637         | 603            | 606        | 632          | 606          |
| K <sub>2</sub> NaInF <sub>6</sub>                               | 633          | 637         | 608            | 611        | 632          | 600          |
| K <sub>2</sub> NaSb <sub>3</sub> O <sub>9</sub>                 | 682          | 679         | 664            | 664        | 693          | 664          |
| K <sub>2</sub> NaScF <sub>6</sub>                               | 633          | 637         | 613            | 615        | 632          | 610          |
| K <sub>2</sub> SnSi <sub>3</sub> O <sub>9</sub>                 | 644          | 657         | 657            | 657        | 676          | 661          |
| K <sub>2</sub> SrTa <sub>2</sub> O <sub>7</sub>                 | 699          | 700         | 697            | 701        | 694          | 690          |
| K <sub>2</sub> Ta <sub>4</sub> O <sub>11</sub>                  | 682          | 685         | 698            | 695        | 699          | 682          |
| Ca <sub>2</sub> LaSbO <sub>6</sub>                              | 706          | 692         | 686            | 688        | 689          | 693          |
| Ca <sub>2</sub> LuNbO <sub>6</sub>                              | 703          | 696         | 692            | 694        | 693          | 705          |
| Ca <sub>2</sub> Nb <sub>2</sub> O <sub>7</sub>                  | 686          | 661         | 656            | 650        | 657          | 642          |
| Ca <sub>2</sub> Sb <sub>2</sub> O <sub>7</sub>                  | 689          | 670         | 668            | 665        | 659          | 664          |
| Ca <sub>2</sub> Y <sub>3</sub> Sb <sub>3</sub> O <sub>14</sub>  | 683          | 692         | 685            | 688        | 691          | 699          |
| Ca <sub>2</sub> ZrSi <sub>4</sub> O <sub>12</sub>               | 641          | 663         | 648            | 647        | 668          | 654          |
| Ca <sub>3</sub> Al <sub>2</sub> O <sub>6</sub>                  | 683          | 662         | 657            | 657        | 672          | 675          |
| Ca <sub>3</sub> Al <sub>2</sub> Si <sub>3</sub> O <sub>12</sub> | 688          | 675         | 656            | 655        | 667          | 674          |
| Ca <sub>3</sub> Ga <sub>2</sub> Ge <sub>4</sub> O <sub>14</sub> | 663          | 679         | 674            | 678        | 676          | 675          |
| Ca <sub>3</sub> Ga <sub>2</sub> Si <sub>3</sub> O <sub>12</sub> | 676          | 676         | 661            | 659        | 669          | 674          |
| Ca <sub>3</sub> Sc <sub>2</sub> Si <sub>3</sub> O <sub>12</sub> | 685          | 675         | 656            | 654        | 667          | 673          |
| Ca <sub>3</sub> SnSi <sub>2</sub> O <sub>9</sub>                | 686          | 671         | 660            | 659        | 668          | 656          |
| Ca <sub>3</sub> WO <sub>6</sub>                                 | 703          | 677         | 678            | 676        | 687          | 675          |
| CaMg <sub>2</sub> Al <sub>6</sub> O <sub>12</sub>               | 683          | 683         | 673            | 677        | 669          | 688          |
| CaNb <sub>2</sub> O <sub>6</sub>                                | 667          | 662         | 669            | 669        | 696          | 669          |
| CaNbO <sub>3</sub>                                              | 706          | 668         | 669            | 669        | 671          | 676          |
| CaSc <sub>2</sub> O <sub>4</sub>                                | 664          | 658         | 656            | 654        | 654          | 651          |
| CaSi <sub>2</sub> O <sub>5</sub>                                | 655          | 653         | 653            | 655        | 694          | 669          |
| CaSiO <sub>3</sub>                                              | 689          | 671         | 673            | 673        | 701          | 685          |
| CaSnO <sub>3</sub>                                              | 714          | 678         | 676            | 675        | 699          | 676          |
| CaTiGeO <sub>5</sub>                                            | 661          | 672         | 668            | 667        | 667          | 683          |
| CaYAlO <sub>4</sub>                                             | 674          | 697         | 685            | 688        | 702          | 705          |
| CaZr <sub>4</sub> O <sub>9</sub>                                | 686          | 675         | 666            | 662        | 659          | 651          |
| CaZrGeO <sub>5</sub>                                            | 663          | 673         | 669            | 666        | 677          | 673          |
| CaZrO <sub>3</sub>                                              | 704          | 672         | 674            | 673        | 702          | 680          |
| Cs <sub>2</sub> GeF <sub>6</sub>                                | 639          | 630         | 623            | 615        | 632          | 623          |
| Cs <sub>2</sub> KTiF <sub>6</sub>                               | 633          | 638         | 637            | 639        | 631          | 623          |
| Cs <sub>2</sub> NaInF <sub>6</sub>                              | 631          | 636         | 618            | 622        | 626          | 599          |
| Cs <sub>2</sub> NaScF <sub>6</sub>                              | 632          | 637         | 613            | 616        | 626          | 601          |
| Cs <sub>2</sub> NaTiF <sub>6</sub>                              | 634          | 636         | 641            | 641        | 631          | 621          |
| Cs <sub>2</sub> Nb <sub>4</sub> O <sub>11</sub>                 | 665          | 654         | 649            | 645        | 648          | 647          |



| <b>Composition</b>                                                                | <b>XGB.r</b> | <b>RF.r</b> | <b>Lasso.r</b> | <b>R.r</b> | <b>KNN.r</b> | <b>SVM.r</b> |
|-----------------------------------------------------------------------------------|--------------|-------------|----------------|------------|--------------|--------------|
| CsSbTeO <sub>6</sub>                                                              | 687          | 665         | 690            | 686        | 695          | 683          |
| CsTiF <sub>4</sub>                                                                | 640          | 630         | 629            | 619        | 632          | 624          |
| K(SbO)(SiO <sub>4</sub> )                                                         | 658          | 659         | 663            | 660        | 689          | 664          |
| K <sub>1.58</sub> Al <sub>11</sub> O <sub>17</sub>                                | 694          | 663         | 658            | 657        | 666          | 656          |
| K <sub>2</sub> BaGe <sub>8</sub> O <sub>18</sub>                                  | 639          | 659         | 665            | 664        | 661          | 656          |
| K <sub>2</sub> Ge <sub>4</sub> O <sub>9</sub>                                     | 658          | 652         | 654            | 653        | 657          | 653          |
| K <sub>2</sub> GeSi <sub>6</sub> O <sub>15</sub>                                  | 630          | 656         | 651            | 652        | 670          | 658          |
| K <sub>2</sub> LaTa <sub>5</sub> O <sub>15</sub>                                  | 678          | 693         | 694            | 692        | 690          | 683          |
| K <sub>2</sub> LiAlF <sub>6</sub>                                                 | 633          | 636         | 604            | 607        | 632          | 607          |
| K <sub>2</sub> NaAlF <sub>6</sub>                                                 | 633          | 637         | 603            | 606        | 632          | 606          |
| K <sub>2</sub> NaInF <sub>6</sub>                                                 | 633          | 637         | 608            | 611        | 632          | 600          |
| K <sub>2</sub> NaSb <sub>3</sub> O <sub>9</sub>                                   | 682          | 679         | 664            | 664        | 693          | 664          |
| K <sub>2</sub> NaScF <sub>6</sub>                                                 | 633          | 637         | 613            | 615        | 632          | 610          |
| K <sub>2</sub> SnSi <sub>3</sub> O <sub>9</sub>                                   | 644          | 657         | 657            | 657        | 676          | 661          |
| K <sub>2</sub> SrTa <sub>2</sub> O <sub>7</sub>                                   | 699          | 700         | 697            | 701        | 694          | 690          |
| K <sub>2</sub> Ta <sub>4</sub> O <sub>11</sub>                                    | 682          | 685         | 698            | 695        | 699          | 682          |
| K <sub>2</sub> TiO <sub>3</sub> (SiO <sub>2</sub> ) <sub>6</sub>                  | 628          | 657         | 643            | 643        | 668          | 658          |
| K <sub>2</sub> TiSi <sub>3</sub> O <sub>9</sub>                                   | 680          | 661         | 648            | 646        | 674          | 654          |
| K <sub>2</sub> ZrSi <sub>3</sub> O <sub>9</sub>                                   | 673          | 663         | 652            | 651        | 668          | 657          |
| K <sub>3</sub> (Nb <sub>3</sub> O <sub>6</sub> )(Si <sub>2</sub> O <sub>7</sub> ) | 681          | 660         | 660            | 659        | 679          | 668          |
| K <sub>3</sub> ScSi <sub>2</sub> O <sub>7</sub>                                   | 683          | 675         | 658            | 658        | 688          | 669          |
| K <sub>4</sub> Sn <sub>2</sub> Si <sub>6</sub> O <sub>18</sub>                    | 643          | 656         | 651            | 649        | 674          | 646          |
| K <sub>4</sub> Zr <sub>5</sub> O <sub>12</sub>                                    | 697          | 666         | 668            | 668        | 699          | 672          |
| KLuTa <sub>2</sub> O <sub>7</sub>                                                 | 701          | 696         | 707            | 707        | 696          | 706          |
| KNaSiF <sub>6</sub>                                                               | 637          | 639         | 608            | 609        | 632          | 619          |
| KNb <sub>8</sub> O <sub>14</sub>                                                  | 695          | 670         | 672            | 671        | 659          | 675          |
| KNbO <sub>3</sub>                                                                 | 691          | 663         | 668            | 668        | 696          | 676          |
| KScO <sub>2</sub>                                                                 | 683          | 668         | 666            | 666        | 699          | 674          |
| KTaO <sub>3</sub>                                                                 | 710          | 695         | 695            | 692        | 700          | 688          |
| KYT <sub>2</sub> O <sub>7</sub>                                                   | 702          | 695         | 696            | 698        | 687          | 700          |
| La <sub>2</sub> MgGeO <sub>6</sub>                                                | 692          | 697         | 712            | 716        | 700          | 710          |
| La <sub>2</sub> NaTaO <sub>6</sub>                                                | 701          | 694         | 708            | 707        | 698          | 696          |
| La <sub>2</sub> SrAl <sub>2</sub> O <sub>7</sub>                                  | 688          | 706         | 710            | 715        | 701          | 722          |
| La <sub>3</sub> LiTi <sub>4</sub> O <sub>12</sub>                                 | 704          | 693         | 696            | 695        | 689          | 702          |
| LaCaGaO <sub>4</sub>                                                              | 688          | 705         | 708            | 712        | 701          | 706          |
| LaK <sub>2</sub> (Nb <sub>5</sub> O <sub>15</sub> )                               | 657          | 669         | 677            | 678        | 688          | 668          |
| LaMgAl <sub>11</sub> O <sub>19</sub>                                              | 675          | 683         | 690            | 694        | 675          | 684          |
| LaSrScO <sub>4</sub>                                                              | 700          | 705         | 703            | 708        | 703          | 710          |
| Li <sub>0.5</sub> La <sub>0.5</sub> TiO <sub>3</sub>                              | 699          | 691         | 677            | 679        | 688          | 702          |
| Li <sub>0.5</sub> TiO <sub>2</sub>                                                | 687          | 661         | 655            | 654        | 674          | 664          |
| Li <sub>2</sub> GeF <sub>6</sub>                                                  | 634          | 628         | 599            | 588        | 624          | 612          |
| Li <sub>2</sub> La <sub>2</sub> Ti <sub>3</sub> O <sub>10</sub>                   | 689          | 699         | 680            | 680        | 674          | 703          |
| Li <sub>2</sub> MgSi <sub>2</sub> (SiO <sub>4</sub> ) <sub>3</sub>                | 634          | 666         | 651            | 659        | 668          | 678          |
| Li <sub>2</sub> MgTi <sub>3</sub> O <sub>8</sub>                                  | 682          | 685         | 663            | 668        | 671          | 677          |

| <b>Composition</b>                                                 | <b>XGB.r</b> | <b>RF.r</b> | <b>Lasso.r</b> | <b>R.r</b> | <b>KNN.r</b> | <b>SVM.r</b> |
|--------------------------------------------------------------------|--------------|-------------|----------------|------------|--------------|--------------|
| Li <sub>2</sub> TiO <sub>3</sub>                                   | 669          | 660         | 651            | 648        | 655          | 652          |
| Li <sub>2</sub> ZrF <sub>6</sub>                                   | 635          | 631         | 607            | 598        | 632          | 618          |
| Li <sub>3</sub> InF <sub>6</sub>                                   | 633          | 630         | 608            | 595        | 624          | 600          |
| Li <sub>3</sub> Na <sub>3</sub> In <sub>2</sub> F <sub>12</sub>    | 632          | 636         | 602            | 604        | 631          | 604          |
| Li <sub>3</sub> TiF <sub>6</sub>                                   | 621          | 626         | 591            | 580        | 624          | 600          |
| Li <sub>6</sub> Zr <sub>2</sub> O <sub>7</sub>                     | 666          | 661         | 656            | 655        | 697          | 656          |
| Li <sub>8</sub> SnO <sub>6</sub>                                   | 681          | 664         | 655            | 655        | 698          | 655          |
| LiAl <sub>5</sub> O <sub>8</sub>                                   | 655          | 652         | 647            | 646        | 655          | 651          |
| LiAlO <sub>2</sub>                                                 | 682          | 668         | 655            | 655        | 697          | 674          |
| LiBaAlF <sub>6</sub>                                               | 631          | 645         | 599            | 606        | 632          | 610          |
| LiCaAlF <sub>6</sub>                                               | 631          | 644         | 615            | 623        | 632          | 628          |
| LiGaO <sub>2</sub>                                                 | 711          | 691         | 674            | 672        | 703          | 685          |
| LiGaSi <sub>2</sub> O <sub>6</sub>                                 | 639          | 661         | 653            | 652        | 671          | 666          |
| LiMgAlF <sub>6</sub>                                               | 633          | 642         | 609            | 614        | 632          | 617          |
| LiScGe <sub>2</sub> O <sub>6</sub>                                 | 650          | 668         | 663            | 662        | 686          | 670          |
| LiScGeO <sub>4</sub>                                               | 681          | 673         | 663            | 662        | 702          | 665          |
| LiScO <sub>2</sub>                                                 | 681          | 666         | 658            | 657        | 698          | 664          |
| LiSrAlF <sub>6</sub>                                               | 631          | 645         | 615            | 622        | 631          | 624          |
| LiTaSiO <sub>5</sub>                                               | 658          | 671         | 669            | 666        | 700          | 670          |
| LiTi <sub>2</sub> O <sub>4</sub>                                   | 690          | 661         | 655            | 654        | 694          | 666          |
| LiTiO <sub>2</sub>                                                 | 695          | 667         | 664            | 663        | 700          | 678          |
| LiTiSi <sub>2</sub> O <sub>6</sub>                                 | 637          | 663         | 649            | 649        | 662          | 661          |
| Mg <sub>2</sub> SnO <sub>4</sub>                                   | 701          | 665         | 666            | 665        | 695          | 664          |
| Mg <sub>4</sub> Nb <sub>2</sub> O <sub>9</sub>                     | 698          | 671         | 667            | 667        | 697          | 663          |
| MgNb <sub>2</sub> O <sub>6</sub>                                   | 667          | 665         | 668            | 668        | 697          | 668          |
| MgScAlO <sub>4</sub>                                               | 676          | 688         | 673            | 676        | 665          | 688          |
| MgTiO <sub>3</sub>                                                 | 685          | 666         | 665            | 664        | 700          | 664          |
| Na(SbO)(SiO <sub>4</sub> )                                         | 642          | 655         | 659            | 656        | 689          | 663          |
| Na <sub>1.77</sub> Al <sub>11</sub> O <sub>17</sub>                | 691          | 663         | 655            | 654        | 667          | 659          |
| Na <sub>2</sub> Ba <sub>4</sub> W <sub>2</sub> O <sub>11</sub>     | 697          | 701         | 699            | 699        | 716          | 696          |
| Na <sub>2</sub> Ca <sub>2</sub> Nb <sub>4</sub> O <sub>13</sub>    | 668          | 687         | 674            | 678        | 695          | 652          |
| Na <sub>2</sub> Ca <sub>2</sub> Ta <sub>3</sub> O <sub>10</sub>    | 701          | 700         | 697            | 700        | 696          | 700          |
| Na <sub>2</sub> GeF <sub>6</sub>                                   | 636          | 625         | 598            | 588        | 624          | 608          |
| Na <sub>2</sub> MgAlF <sub>7</sub>                                 | 632          | 646         | 605            | 613        | 632          | 614          |
| Na <sub>2</sub> Nb <sub>4</sub> O <sub>11</sub>                    | 661          | 655         | 664            | 662        | 657          | 662          |
| Na <sub>2</sub> Si <sub>3</sub> O <sub>7</sub>                     | 646          | 652         | 651            | 653        | 698          | 668          |
| Na <sub>2</sub> SnO <sub>3</sub>                                   | 681          | 665         | 664            | 663        | 693          | 655          |
| Na <sub>2</sub> Ta <sub>4</sub> O <sub>11</sub>                    | 685          | 684         | 695            | 691        | 700          | 679          |
| Na <sub>2</sub> Ti <sub>2</sub> O <sub>3</sub> (SiO <sub>4</sub> ) | 685          | 677         | 649            | 647        | 668          | 658          |
| Na <sub>2</sub> TiOSi <sub>4</sub> O <sub>10</sub>                 | 657          | 661         | 644            | 644        | 668          | 654          |
| Na <sub>2</sub> TiSi <sub>5</sub> O <sub>13</sub>                  | 642          | 657         | 640            | 641        | 668          | 660          |
| Na <sub>2</sub> ZrSi <sub>4</sub> O <sub>11</sub>                  | 628          | 658         | 648            | 648        | 662          | 659          |
| Na <sub>3</sub> AlF <sub>6</sub>                                   | 636          | 628         | 607            | 597        | 631          | 621          |
| Na <sub>3</sub> Ca <sub>2</sub> TaO <sub>6</sub>                   | 691          | 696         | 676            | 679        | 699          | 681          |

| <b>Composition</b>                                               | <b>XGB.r</b> | <b>RF.r</b> | <b>Lasso.r</b> | <b>R.r</b> | <b>KNN.r</b> | <b>SVM.r</b> |
|------------------------------------------------------------------|--------------|-------------|----------------|------------|--------------|--------------|
| Na <sub>3</sub> Li <sub>3</sub> Al <sub>2</sub> F <sub>12</sub>  | 632          | 635         | 597            | 599        | 632          | 600          |
| Na <sub>3</sub> Li <sub>3</sub> Sc <sub>2</sub> F <sub>12</sub>  | 632          | 635         | 597            | 599        | 632          | 600          |
| Na <sub>3</sub> Li <sub>3</sub> Ti <sub>2</sub> F <sub>12</sub>  | 632          | 635         | 598            | 600        | 632          | 603          |
| Na <sub>3</sub> ScF <sub>6</sub>                                 | 636          | 628         | 607            | 597        | 631          | 614          |
| Na <sub>3</sub> ScSi <sub>2</sub> O <sub>7</sub>                 | 681          | 673         | 650            | 649        | 676          | 663          |
| Na <sub>4</sub> Sc <sub>2</sub> Ge <sub>4</sub> O <sub>13</sub>  | 680          | 668         | 665            | 662        | 682          | 666          |
| Na <sub>4</sub> Sc <sub>2</sub> Si <sub>4</sub> O <sub>13</sub>  | 678          | 668         | 655            | 653        | 680          | 665          |
| Na <sub>4</sub> Sn <sub>2</sub> (SiO <sub>4</sub> ) <sub>3</sub> | 680          | 662         | 657            | 657        | 660          | 659          |
| Na <sub>4</sub> Sn <sub>3</sub> O <sub>8</sub>                   | 691          | 661         | 664            | 663        | 694          | 657          |
| Na <sub>5</sub> Ti <sub>6</sub> O <sub>13</sub>                  | 655          | 662         | 662            | 658        | 655          | 659          |
| Na <sub>6</sub> Li <sub>2</sub> W <sub>2</sub> O <sub>10</sub>   | 681          | 684         | 674            | 673        | 702          | 673          |
| Na <sub>8</sub> Si(Si <sub>6</sub> O <sub>18</sub> )             | 669          | 654         | 647            | 649        | 673          | 665          |
| Na <sub>8</sub> SnSi <sub>6</sub> O <sub>18</sub>                | 687          | 656         | 649            | 651        | 694          | 651          |
| NaAlO <sub>2</sub>                                               | 684          | 667         | 663            | 663        | 699          | 680          |
| NaBa <sub>4</sub> Sb <sub>3</sub> O <sub>12</sub>                | 703          | 697         | 691            | 693        | 685          | 698          |
| NaCa <sub>2</sub> Ta <sub>3</sub> O <sub>10</sub>                | 699          | 700         | 694            | 695        | 692          | 689          |
| NaCa <sub>4</sub> Nb <sub>5</sub> O <sub>17</sub>                | 683          | 686         | 613            | 617        | 654          | 639          |
| NaCa <sub>5</sub> TaO <sub>8</sub>                               | 687          | 688         | 672            | 676        | 693          | 677          |
| NaGaSi <sub>2</sub> O <sub>6</sub>                               | 640          | 662         | 658            | 657        | 671          | 660          |
| NaLaTi <sub>2</sub> O <sub>6</sub>                               | 704          | 695         | 679            | 681        | 683          | 700          |
| NaNb <sub>3</sub> Te <sub>4</sub> O <sub>16</sub>                | 638          | 661         | 668            | 663        | 683          | 673          |
| NaNbO <sub>3</sub>                                               | 684          | 662         | 664            | 665        | 696          | 672          |
| NaSbGeO <sub>5</sub>                                             | 648          | 665         | 668            | 667        | 699          | 677          |
| NaSbO <sub>3</sub>                                               | 698          | 670         | 672            | 671        | 695          | 679          |
| NaScGe <sub>2</sub> O <sub>6</sub>                               | 648          | 667         | 662            | 661        | 672          | 666          |
| NaScO <sub>2</sub>                                               | 682          | 668         | 663            | 663        | 699          | 672          |
| NaScSi <sub>2</sub> O <sub>6</sub>                               | 640          | 664         | 651            | 651        | 670          | 664          |
| NaSr <sub>2</sub> Nb <sub>5</sub> O <sub>15</sub>                | 668          | 680         | 669            | 672        | 692          | 665          |
| NaSr <sub>4</sub> Sb <sub>3</sub> O <sub>12</sub>                | 692          | 687         | 683            | 683        | 685          | 685          |
| NaTaO <sub>3</sub>                                               | 712          | 695         | 691            | 688        | 701          | 686          |
| NaTi <sub>2</sub> Ga <sub>5</sub> O <sub>12</sub>                | 673          | 688         | 666            | 668        | 667          | 679          |
| NaTi <sub>8</sub> O <sub>13</sub>                                | 695          | 662         | 663            | 660        | 655          | 661          |
| NaTiSi <sub>2</sub> O <sub>6</sub>                               | 641          | 662         | 654            | 653        | 662          | 659          |
| NaYTiO <sub>4</sub>                                              | 694          | 689         | 676            | 680        | 683          | 680          |
| Rb <sub>12</sub> Nb <sub>33</sub> O <sub>90</sub>                | 663          | 653         | 666            | 666        | 655          | 660          |
| Rb <sub>2.6</sub> Al <sub>22</sub> O <sub>34</sub>               | 694          | 660         | 667            | 666        | 667          | 662          |
| Rb <sub>2</sub> Ge <sub>4</sub> O <sub>9</sub>                   | 658          | 653         | 665            | 663        | 659          | 660          |
| Rb <sub>2</sub> GeTeO <sub>6</sub>                               | 677          | 663         | 687            | 683        | 681          | 689          |
| Rb <sub>2</sub> KScF <sub>6</sub>                                | 634          | 637         | 627            | 629        | 632          | 618          |
| Rb <sub>2</sub> KTiF <sub>6</sub>                                | 633          | 638         | 625            | 627        | 631          | 617          |
| Rb <sub>2</sub> NaAlF <sub>6</sub>                               | 633          | 637         | 607            | 611        | 632          | 603          |
| Rb <sub>2</sub> NaTiF <sub>6</sub>                               | 633          | 638         | 628            | 630        | 631          | 620          |
| Rb <sub>2</sub> SnSi <sub>3</sub> O <sub>9</sub>                 | 647          | 657         | 670            | 670        | 666          | 668          |
| Rb <sub>2</sub> TiSi <sub>3</sub> O <sub>9</sub>                 | 684          | 662         | 667            | 667        | 667          | 676          |
| RbAl <sub>3</sub> (P <sub>3</sub> O <sub>10</sub> ) <sub>2</sub> | 659          | 675         | 660            | 663        | 669          | 663          |

| <b>Composition</b>                                                                            | <b>XGB.r</b> | <b>RF.r</b> | <b>Lasso.r</b> | <b>R.r</b> | <b>KNN.r</b> | <b>SVM.r</b> |
|-----------------------------------------------------------------------------------------------|--------------|-------------|----------------|------------|--------------|--------------|
| RbAlTi <sub>3</sub> O <sub>8</sub>                                                            | 692          | 687         | 683            | 689        | 691          | 679          |
| RbCa <sub>2</sub> Nb <sub>3</sub> O <sub>10</sub>                                             | 688          | 688         | 686            | 692        | 691          | 698          |
| RbNb(SiO <sub>3</sub> )O <sub>2</sub>                                                         | 658          | 658         | 662            | 658        | 683          | 658          |
| RbNbGe <sub>3</sub> O <sub>9</sub>                                                            | 687          | 661         | 672            | 673        | 689          | 675          |
| RbTaGe <sub>3</sub> O <sub>9</sub>                                                            | 691          | 670         | 680            | 679        | 689          | 669          |
| Sr <sub>0.5</sub> Al <sub>11</sub> O <sub>17</sub>                                            | 669          | 660         | 664            | 663        | 667          | 658          |
| Sr <sub>2</sub> Al <sub>6</sub> O <sub>11</sub>                                               | 671          | 661         | 670            | 666        | 655          | 662          |
| Sr <sub>2</sub> LaSbO <sub>6</sub>                                                            | 707          | 692         | 700            | 702        | 693          | 704          |
| Sr <sub>2</sub> LuNbO <sub>6</sub>                                                            | 696          | 694         | 705            | 707        | 691          | 709          |
| Sr <sub>2</sub> Sc <sub>0.5</sub> Al <sub>1.5</sub> O <sub>5</sub>                            | 693          | 694         | 685            | 689        | 691          | 699          |
| Sr <sub>2</sub> ScGaO <sub>5</sub>                                                            | 690          | 694         | 680            | 681        | 668          | 681          |
| Sr <sub>2</sub> ScSbO <sub>6</sub>                                                            | 706          | 694         | 698            | 702        | 693          | 704          |
| Sr <sub>2</sub> SnO <sub>4</sub>                                                              | 707          | 688         | 690            | 689        | 700          | 688          |
| Sr <sub>2</sub> Ta <sub>2</sub> O <sub>7</sub>                                                | 684          | 681         | 673            | 667        | 660          | 653          |
| Sr <sub>2</sub> YSbO <sub>6</sub>                                                             | 704          | 695         | 691            | 695        | 702          | 699          |
| Sr <sub>3</sub> MgTa <sub>2</sub> O <sub>9</sub>                                              | 695          | 702         | 710            | 713        | 716          | 700          |
| Sr <sub>3</sub> NaNbO <sub>6</sub>                                                            | 696          | 687         | 680            | 680        | 699          | 692          |
| Sr <sub>3</sub> NaSbO <sub>6</sub>                                                            | 704          | 693         | 683            | 683        | 699          | 692          |
| Sr <sub>3</sub> NaTaO <sub>6</sub>                                                            | 699          | 694         | 690            | 688        | 699          | 689          |
| Sr <sub>3</sub> Ta <sub>6</sub> Si <sub>4</sub> O <sub>26</sub>                               | 666          | 677         | 687            | 685        | 695          | 669          |
| Sr <sub>3</sub> Zr <sub>2</sub> O <sub>7</sub>                                                | 707          | 680         | 686            | 683        | 672          | 677          |
| Sr <sub>4</sub> Ti <sub>5</sub> (Si <sub>2</sub> O <sub>7</sub> ) <sub>2</sub> O <sub>8</sub> | 663          | 667         | 675            | 670        | 678          | 671          |
| Sr <sub>7</sub> Na <sub>2</sub> Al <sub>6</sub> F <sub>34</sub>                               | 627          | 635         | 602            | 604        | 629          | 590          |
| Sr <sub>7</sub> Zr(Si <sub>2</sub> O <sub>7</sub> ) <sub>3</sub>                              | 633          | 648         | 638            | 646        | 631          | 634          |
| SrAl <sub>8</sub> Ti <sub>3</sub> O <sub>19</sub>                                             | 669          | 672         | 676            | 670        | 659          | 648          |
| SrGd <sub>2</sub> Sc <sub>2</sub> O <sub>7</sub>                                              | 702          | 700         | 707            | 711        | 701          | 701          |
| SrLa <sub>2</sub> Sc <sub>2</sub> O <sub>7</sub>                                              | 700          | 697         | 696            | 698        | 702          | 704          |
| SrLi <sub>2</sub> Ti <sub>6</sub> O <sub>14</sub>                                             | 664          | 666         | 666            | 660        | 661          | 657          |
| SrNb <sub>2</sub> O <sub>6</sub>                                                              | 676          | 666         | 678            | 677        | 657          | 676          |
| SrNb <sub>4</sub> O <sub>6</sub>                                                              | 713          | 694         | 695            | 694        | 697          | 699          |
| SrNb <sub>8</sub> O <sub>14</sub>                                                             | 692          | 673         | 682            | 681        | 659          | 682          |
| SrNbO <sub>3</sub>                                                                            | 712          | 693         | 689            | 689        | 696          | 695          |
| SrSi <sub>2</sub> O <sub>5</sub>                                                              | 660          | 654         | 667            | 668        | 671          | 674          |
| SrSnO <sub>3</sub>                                                                            | 718          | 694         | 695            | 694        | 700          | 693          |
| SrZrO <sub>3</sub>                                                                            | 707          | 687         | 686            | 685        | 699          | 688          |
| SrZrSi <sub>2</sub> O <sub>7</sub>                                                            | 641          | 662         | 669            | 668        | 667          | 672          |

**Table S3. Feature set.**

| <b>Feature number</b> | <b>Variable</b>                                      | <b>Feature number</b> | <b>Variable</b>                                                                                 |
|-----------------------|------------------------------------------------------|-----------------------|-------------------------------------------------------------------------------------------------|
| 1                     | Fluoride/Oxide/Oxyfluoride (1/2/3)                   | 14                    | Difference between oxidation state of $Mn^{4+}$ and substitute element                          |
| 2                     | Number of element type                               | 15                    | Difference between ionic radii of $Mn^{4+}$ and that of the substitute element ( $\text{\AA}$ ) |
| 3                     | Crystal system                                       | 16                    | Average electronegativity                                                                       |
| 4                     | Space group                                          | 17                    | Average ionization energy ( $kJ/mol$ )                                                          |
| 5                     | Number of molecules in unit cell(Z)                  | 18                    | Average electron affinity energy ( $kJ/mol$ )                                                   |
| 6                     | Crystal volume ( $\text{\AA}^3$ )                    | 19-24                 | lattice ( $\text{\AA}$ )                                                                        |
| 7                     | Crystal density ( $g/cm^3$ )                         | 25-30                 | bond length ( $\text{\AA}$ )                                                                    |
| 8                     | Species of Octahedra                                 | 31-42                 | Edge length of octahedron ( $\text{\AA}$ )                                                      |
| 9                     | Number of substitutable octahedrons                  | 43-57                 | Bond angle                                                                                      |
| 10                    | Number of irreplaceable octahedrons                  | 58-62                 | Whether the element is an activator or not (takes 1/0)                                          |
| 11                    | Number of atoms in unit cell                         | 63-67                 | Atomic number of elements                                                                       |
| 12                    | Ionic radii of substituted elements ( $\text{\AA}$ ) | 68-72                 | Oxidation state                                                                                 |
| 13                    | Coordination number (CN)                             | 73-77                 | Electronegativity                                                                               |

| <b>Feature number</b> | <b>Variable</b>                                                    | <b>Feature number</b> | <b>Variable</b>                                                     |
|-----------------------|--------------------------------------------------------------------|-----------------------|---------------------------------------------------------------------|
| 78-82                 | Ionization energy ( <i>kJ/mol</i> )                                | 98-102                | Number of valence electrons present in highest sub-shell (0/1/2...) |
| 83-87                 | Electron affinity energy ( <i>kJ/mol</i> )                         | 103-107               | Total Valence Electrons                                             |
| 88-92                 | Number of valence electrons present in lowest sub-shell (1/2/3...) | 108-112               | The number of atoms per element                                     |
| 93-97                 | Number of valence electrons present in middle sub-shell (0/1/2...) |                       |                                                                     |

**Table S4. Synthesis conditions of samples.**

|                                                  | Temperature (°C) | Time (h) |
|--------------------------------------------------|------------------|----------|
| $\text{Sr}_2\text{ScSbO}_6: 0.004\text{Mn}^{4+}$ | 1350             | 12       |
| $\text{Ba}_2\text{YNbO}_6: \text{Mn}^{4+}$       | 1350             | 8        |
| $\text{Ba}_2\text{YSbO}_6: 0.01\text{Mn}^{4+}$   | 1300             | 10       |
| $\text{Sr}_2\text{LaSbO}_6: 0.008\text{Mn}^{4+}$ | 1300             | 6        |
| $\text{Mg}_2\text{TiO}_4: 0.004\text{Mn}^{4+}$   | 1250             | 9        |
| $\text{Sr}_2\text{LaSbO}_6: 0.003\text{Mn}^{4+}$ | 1300             | 6        |

Table S5 The parameters of the phosphor characterization that make the KNN.r algorithm perform optimally.

|                                                        | O/F/O<br>F | lat_para_<br>b | cryst_de<br>ns | species_octahed<br>ra | valence_<br>1 | num_atomic<br>2 | valence_<br>3 | EA_3       | valence_<br>4 | IE_4        | EA_4       | num_VEPM<br>4 | AVG_E<br>A |
|--------------------------------------------------------|------------|----------------|----------------|-----------------------|---------------|-----------------|---------------|------------|---------------|-------------|------------|---------------|------------|
| (NH <sub>4</sub> ) <sub>2</sub> NaIn<br>F <sub>6</sub> | 1          | 8.67           | 2.94           | 1                     | 3             | 8               | 1             | 72.77      | 1             | 495.85      | 52.87      | 0             | 146.27     |
| (NH <sub>4</sub> ) <sub>2</sub> SiF <sub>6</sub>       | 1          | 8.40           | 2.00           | 1                     | 4             | 8               | 1             | 72.77      | -1            | 1681.0<br>0 | 328.1<br>6 | 5             | 157.95     |
| (NH <sub>4</sub> ) <sub>2</sub> SnF <sub>6</sub>       | 1          | 6.08           | 2.86           | 1                     | 4             | 2               | 1             | 72.77      | -1            | 1681.0<br>0 | 328.1<br>6 | 5             | 156.38     |
| (NH <sub>4</sub> ) <sub>2</sub> TiF <sub>6</sub>       | 1          | 5.97           | 2.21           | 1                     | 4             | 2               | 1             | 72.77      | -1            | 1681.0<br>0 | 328.1<br>6 | 5             | 150.51     |
| Ba <sub>2</sub> CaWO <sub>6</sub>                      | 2          | 8.39           | 6.69           | 1                     | 6             | 8               | 2             | 2.37       | -2            | 1313.9<br>0 | 140.9<br>8 | 4             | 95.49      |
| Ba <sub>2</sub> GdNbO <sub>6</sub>                     | 2          | 8.50           | 6.72           | 1                     | 5             | 4               | 3             | 0.00       | -2            | 1313.9<br>0 | 140.9<br>8 | 4             | 96.22      |
| Ba <sub>2</sub> LaNbO <sub>6</sub>                     | 2          | 6.06           | 6.41           | 1                     | 5             | 4               | 3             | 45.35      | -2            | 1313.9<br>0 | 140.9<br>8 | 4             | 100.75     |
| Ba <sub>2</sub> LaSbO <sub>6</sub>                     | 2          | 6.08           | 6.54           | 1                     | 5             | 2               | 3             | 45.35      | -2            | 1313.9<br>0 | 140.9<br>8 | 4             | 102.01     |
| Ba <sub>2</sub> LuNbO <sub>6</sub>                     | 2          | 8.36           | 7.25           | 1                     | 5             | 8               | 3             | 32.81      | -2            | 1313.9<br>0 | 140.9<br>8 | 4             | 99.50      |
| Ba <sub>2</sub> LuTaO <sub>6</sub>                     | 2          | 8.38           | 8.21           | 1                     | 5             | 8               | 3             | 32.81      | -2            | 1313.9<br>0 | 140.9<br>8 | 4             | 93.77      |
| Ba <sub>2</sub> MgWO <sub>6</sub>                      | 2          | 8.13           | 7.14           | 1                     | 6             | 8               | 2             | 0.00       | -2            | 1313.9<br>0 | 140.9<br>8 | 4             | 95.25      |
| Ba <sub>2</sub> MgWO <sub>6</sub>                      | 2          | 8.13           | 7.14           | 1                     | 6             | 8               | 2             | 0.00       | -2            | 1313.9<br>0 | 140.9<br>8 | 4             | 95.25      |
| Ba <sub>2</sub> YNbO <sub>6</sub>                      | 2          | 8.44           | 6.10           | 2                     | 5             | 8               | 3             | 29.62      | -2            | 1313.9<br>0 | 140.9<br>8 | 4             | 92.48      |
| Ba <sub>2</sub> YTaO <sub>6</sub>                      | 2          | 8.45           | 7.07           | 1                     | 5             | 8               | 3             | 29.62      | -2            | 1313.9<br>0 | 140.9<br>8 | 4             | 93.45      |
| BaGe <sub>4</sub> O <sub>9</sub>                       | 2          | 11.61          | 5.15           | 2                     | 4             | 9               | -2            | 140.9<br>8 | 0             | 0.00        | 0.00       | 0             | 21.56      |
| BaGeF <sub>6</sub>                                     | 1          | 4.83           | 4.93           | 1                     | 4             | 1               | -1            | 328.1<br>6 | 0             | 0.00        | 0.00       | 0             | 262.73     |
| BaLaMgNb<br>O <sub>6</sub>                             | 2          | 8.06           | 6.20           | 1                     | 5             | 8               | 3             | 45.35      | 2             | 737.75      | 0.00       | 0             | 87.74      |
| BaLaZnTaO<br>6                                         | 2          | 8.09           | 7.77           | 1                     | 5             | 4               | 3             | 45.35      | 2             | 906.40      | 0.00       | 10            | 10.04      |
| BaSn(PO <sub>4</sub> ) <sub>2</sub>                    | 2          | 5.25           | 4.37           | 1                     | 4             | 2               | 5             | 72.04      | -2            | 1313.9<br>0 | 140.9<br>8 | 4             | 116.10     |
| BaSnF <sub>6</sub>                                     | 1          | 7.43           | 5.20           | 1                     | 4             | 3               | -1            | 328.1<br>6 | 0             | 0.00        | 0.00       | 0             | 275.27     |



|                                                                   | O/F/O<br>F | lat_para<br>b | cryst_de<br>ns | species_octahe<br>dra | valence_<br>1 | num_atomic<br>2 | valence_<br>3 | EA_3       | valence_<br>4 | IE_4        | EA_4       | num_VEP<br>M_4 | AVG_E<br>A |
|-------------------------------------------------------------------|------------|---------------|----------------|-----------------------|---------------|-----------------|---------------|------------|---------------|-------------|------------|----------------|------------|
| BaTiF <sub>6</sub>                                                | 1          | 7.37          | 4.37           | 1                     | 4             | 0               | -1            | 328.1<br>6 | 0             | 0.00        | 0.00       | 0              | 40.60      |
| BaTiOF <sub>4</sub>                                               | 3          | 13.76         | 4.69           | 1                     | 4             | 4               | -2            | 140.9<br>8 | -1            | 1681.0<br>0 | 328.1<br>6 | 5              | 210.74     |
| BaZn <sub>1-06</sub> Al <sub>9-94</sub><br>O <sub>17</sub>        | 2          | 5.61          | 4.02           | 2                     | 3             | 2               | 2             | 0.00       | -2            | 1313.9<br>0 | 140.9<br>8 | 4              | 95.67      |
| Ca <sub>14</sub> Al <sub>10</sub> Zn <sub>6</sub> O <sub>35</sub> | 2          | 14.87         | 3.60           | 1                     | 3             | 24              | 2             | 0.00       | -2            | 1313.9<br>0 | 140.9<br>8 | 4              | 86.55      |
| Ca <sub>14</sub> Zn <sub>6</sub> Ga <sub>10</sub> O <sub>35</sub> | 2          | 15.08         | 4.28           | 1                     | 3             | 56              | 2             | 0.00       | -2            | 1313.9<br>0 | 140.9<br>8 | 4              | 82.81      |
| Ca <sub>2</sub> AlNbO <sub>6</sub>                                | 2          | 5.42          | 4.43           | 2                     | 3             | 4               | 5             | 88.38      | -2            | 1313.9<br>0 | 140.9<br>8 | 4              | 98.08      |
| Ca <sub>2</sub> InSbO <sub>6</sub>                                | 2          | 5.69          | 5.51           | 2                     | 5             | 4               | 3             | 28.95      | -2            | 1313.9<br>0 | 140.9<br>8 | 4              | 98.05      |
| Ca <sub>2</sub> LaSbO <sub>6</sub>                                | 2          | 5.88          | 5.32           | 1                     | 5             | 4               | 3             | 45.35      | -2            | 1313.9<br>0 | 140.9<br>8 | 4              | 99.69      |
| Ca <sub>2</sub> LaTaO <sub>6</sub>                                | 2          | 5.89          | 6.04           | 1                     | 5             | 4               | 3             | 45.35      | -2            | 1313.9<br>0 | 140.9<br>8 | 4              | 92.70      |
| Ca <sub>2</sub> MgWO <sub>6</sub>                                 | 2          | 5.55          | 5.49           | 1                     | 6             | 4               | 2             | 0.00       | -2            | 1313.9<br>0 | 140.9<br>8 | 4              | 92.94      |
| Ca <sub>2</sub> MgWO <sub>6</sub>                                 | 2          | 5.55          | 5.49           | 1                     | 6             | 4               | 2             | 0.00       | -2            | 1313.9<br>0 | 140.9<br>8 | 4              | 92.94      |
| Ca <sub>2</sub> ScSbO <sub>6</sub>                                | 2          | 5.62          | 4.68           | 1                     | 5             | 4               | 3             | 18.14      | -2            | 1313.9<br>0 | 140.9<br>8 | 4              | 96.97      |
| Ca <sub>2</sub> WO <sub>2</sub> F <sub>4</sub>                    | 3          | 6.28          | 5.39           | 1                     | 6             | 2               | -2            | 140.9<br>8 | -1            | 1681.0<br>0 | 328.1<br>6 | 5              | 186.45     |
| CaMg <sub>2</sub> Al <sub>16</sub> O <sub>27</sub>                | 2          | 5.59          | 3.73           | 7                     | 3             | 2               | 2             | 0.00       | -2            | 1313.9<br>0 | 140.9<br>8 | 4              | 97.33      |
| CaMg <sub>2</sub> Al <sub>16</sub> O <sub>27</sub>                | 2          | 5.59          | 3.73           | 7                     | 3             | 2               | 2             | 0.00       | -2            | 1313.9<br>0 | 140.9<br>8 | 4              | 98.56      |
| Cs <sub>2</sub> GeF <sub>6</sub>                                  | 1          | 8.99          | 4.14           | 1                     | 4             | 8               | -1            | 328.1<br>6 | 0             | 0.00        | 0.00       | 0              | 242.10     |
| Cs <sub>2</sub> HfF <sub>6</sub>                                  | 1          | 6.39          | 5.24           | 1                     | 4             | 2               | -1            | 328.1<br>6 | 0             | 0.00        | 0.00       | 0              | 229.04     |
| Cs <sub>2</sub> KCrF <sub>6</sub>                                 | 1          | 9.00          | 4.28           | 1                     | 3             | 8               | 1             | 48.39      | -1            | 1681.0<br>0 | 328.1<br>6 | 5              | 217.26     |
| Cs <sub>2</sub> NaAl <sub>3</sub> F <sub>12</sub>                 | 1          | 7.31          | 3.82           | 1                     | 3             | 2               | 1             | 52.87      | -1            | 1681.0<br>0 | 328.1<br>6 | 5              | 233.73     |
| Cs <sub>2</sub> SiF <sub>6</sub>                                  | 1          | 8.92          | 3.86           | 1                     | 4             | 8               | -1            | 328.1<br>6 | 0             | 0.00        | 0.00       | 0              | 243.78     |

|                                                   | O/F/O<br>F | lat_para_<br>b | cryst_de<br>ns | species_octahe<br>dra | valence_<br>1 | num_atomic<br>2 | valence_<br>3 | EA_3       | valence_<br>4 | IE_4        | EA_4       | num_VEPM<br>4 | AVG_E<br>A |
|---------------------------------------------------|------------|----------------|----------------|-----------------------|---------------|-----------------|---------------|------------|---------------|-------------|------------|---------------|------------|
| Cs <sub>2</sub> ZrF <sub>6</sub>                  | 1          | 6.41           | 4.39           | 1                     | 4             | 2               | -1            | 328.1<br>6 | 0             | 0.00        | 0.00       | 0             | 233.45     |
| CsMoO <sub>2</sub> F <sub>3</sub>                 | 3          | 6.46           | 4.22           | 1                     | 6             | 4               | -2            | 140.9<br>8 | -1            | 1681.0<br>0 | 328.1<br>6 | 5             | 197.73     |
| Gd <sub>2</sub> ZnTiO <sub>6</sub>                | 2          | 5.66           | 7.47           | 1                     | 4             | 4               | 2             | 0.00       | -2            | 1313.9<br>0 | 140.9<br>8 | 4             | 85.35      |
| Gd <sub>2</sub> ZnTiO <sub>6</sub>                | 2          | 5.66           | 7.47           | 1                     | 4             | 4               | 2             | 0.00       | -2            | 1313.9<br>0 | 140.9<br>8 | 4             | 85.35      |
| K <sub>2</sub> BaGe <sub>8</sub> O <sub>18</sub>  | 2          | 11.73          | 4.70           | 4                     | 4             | 12              | 2             | 13.95      | -2            | 1313.9<br>0 | 140.9<br>8 | 4             | 124.13     |
| K <sub>2</sub> GeF <sub>6</sub>                   | 1          | 5.63           | 3.44           | 1                     | 4             | 2               | -1            | 328.1<br>6 | 0             | 0.00        | 0.00       | 0             | 242.74     |
| K <sub>2</sub> LiAlF <sub>6</sub>                 | 1          | 7.84           | 3.11           | 1                     | 3             | 8               | 1             | 59.63      | -1            | 1681.0<br>0 | 328.1<br>6 | 5             | 216.71     |
| K <sub>2</sub> NaInF <sub>6</sub>                 | 1          | 8.56           | 3.49           | 1                     | 3             | 8               | 1             | 52.87      | -1            | 1681.0<br>0 | 328.1<br>6 | 5             | 214.75     |
| K <sub>2</sub> SiF <sub>6</sub>                   | 1          | 8.13           | 2.72           | 1                     | 4             | 8               | -1            | 328.1<br>6 | 0             | 0.00        | 0.00       | 0             | 244.42     |
| K <sub>2</sub> TiF <sub>6</sub>                   | 1          | 5.72           | 3.03           | 1                     | 4             | 2               | -1            | 328.1<br>6 | 0             | 0.00        | 0.00       | 0             | 230.37     |
| K <sub>3</sub> AlF <sub>6</sub>                   | 1          | 18.84          | 2.85           | 5                     | 3             | 23              | -1            | 328.1<br>6 | 0             | 0.00        | 0.00       | 0             | 219.08     |
| KGaP <sub>2</sub> O <sub>7</sub>                  | 2          | 9.87           | 3.30           | 1                     | 3             | 4               | 5             | 72.04      | -2            | 1313.9<br>0 | 140.9<br>8 | 4             | 110.98     |
| KNaSiF <sub>6</sub>                               | 1          | 5.50           | 2.70           | 1                     | 4             | 4               | 1             | 52.87      | -1            | 1681.0<br>0 | 328.1<br>6 | 5             | 244.92     |
| KZnF <sub>3</sub>                                 | 1          | 4.07           | 4.02           | 1                     | 2             | 1               | -1            | 328.1<br>6 | 0             | 0.00        | 0.00       | 0             | 206.57     |
| La(MgTiO <sub>6</sub> )<br>0.5                    | 2          | 3.96           | 5.96           | 1                     | 4             | 1               | 2             | 0.00       | -2            | 1313.9<br>0 | 140.9<br>8 | 4             | 79.32      |
| La <sub>2</sub> ZnTiO <sub>6</sub>                | 2          | 5.60           | 6.53           | 2                     | 4             | 4               | 2             | 0.00       | -2            | 1313.9<br>0 | 140.9<br>8 | 4             | 94.42      |
| La <sub>3</sub> GaGe <sub>5</sub> O <sub>16</sub> | 2          | 8.09           | 6.00           | 1                     | 4             | 6               | 3             | 41.49      | -2            | 1313.9<br>0 | 140.9<br>8 | 4             | 121.12     |
| LaAlO <sub>3</sub>                                | 2          | 5.36           | 6.52           | 1                     | 3             | 2               | -2            | 140.9<br>8 | 0             | 0.00        | 0.00       | 0             | 102.01     |
| LaScO <sub>3</sub>                                | 2          | 5.79           | 5.78           | 1                     | 3             | 4               | -2            | 140.9<br>8 | 0             | 0.00        | 0.00       | 0             | 97.29      |
| LaSrZnNbO<br>6                                    | 2          | 8.00           | 6.24           | 1                     | 5             | 4               | 2             | 4.63       | 2             | 906.40      | 0.00       | 10            | 15.37      |
| LaSrZnSbO <sub>6</sub>                            | 2          | 5.66           | 6.61           | 1                     | 5             | 2               | 2             | 0.00       | -2            | 1313.9<br>0 | 140.9<br>8 | 4             | 28.72      |

|                                                                              | O/F/O<br>F | lat_para<br>b | cryst_de<br>ns | species_octahe<br>dra | valence<br>1 | num_atomic<br>2 | valence<br>3 | EA_3       | valence<br>4 | IE_4        | EA_4       | num_VEPM<br>4 | AVG_E<br>A |
|------------------------------------------------------------------------------|------------|---------------|----------------|-----------------------|--------------|-----------------|--------------|------------|--------------|-------------|------------|---------------|------------|
| LaTiSbO <sub>6</sub>                                                         | 2          | 5.21          | 5.54           | 1                     | 5            | 1               | 4            | 7.62       | -2           | 1313.9<br>0 | 140.9<br>8 | 4             | 111.09     |
| Li <sub>2</sub> MgZrO <sub>4</sub>                                           | 2          | 4.21          | 3.96           | 1                     | 4            | 4               | 2            | 0.00       | -2           | 1313.9<br>0 | 140.9<br>8 | 4             | 90.54      |
| Li <sub>2</sub> SnO <sub>3</sub>                                             | 2          | 9.18          | 6.00           | 2                     | 4            | 16              | -2           | 140.9<br>8 | 0            | 0.00        | 0.00       | 0             | 108.25     |
| Li <sub>2</sub> ZnTi <sub>3</sub> O <sub>8</sub>                             | 2          | 8.37          | 3.97           | 1                     | 4            | 8               | 2            | 0.00       | -2           | 1313.9<br>0 | 140.9<br>8 | 4             | 90.71      |
| Li <sub>3</sub> Mg <sub>2</sub> NbO <sub>6</sub>                             | 2          | 8.56          | 3.84           | 1                     | 5            | 24              | 2            | 0.00       | -2           | 1313.9<br>0 | 140.9<br>8 | 4             | 92.76      |
| Li <sub>5</sub> La <sub>3</sub> Nb <sub>2</sub> O <sub>12</sub>              | 2          | 12.80         | 5.26           | 2                     | 5            | 40              | 3            | 45.35      | -2           | 1313.9<br>0 | 140.9<br>8 | 4             | 104.67     |
| Li <sub>5</sub> La <sub>3</sub> Ta <sub>2</sub> O <sub>12</sub>              | 2          | 12.81         | 6.36           | 1                     | 5            | 40              | 3            | 45.35      | -2           | 1313.9<br>0 | 140.9<br>8 | 4             | 99.46      |
| Li <sub>6</sub> SrLa <sub>2</sub> Sb <sub>2</sub> O <sub>12</sub>            | 2          | 12.89         | 5.22           | 1                     | 5            | 48              | 2            | 4.63       | 3            | 538.09      | 45.35      | 1             | 102.03     |
| LiLa <sub>2</sub> SbO <sub>6</sub>                                           | 2          | 5.72          | 6.51           | 1                     | 5            | 2               | 3            | 45.35      | -2           | 1313.9<br>0 | 140.9<br>8 | 4             | 109.71     |
| LiSrAlF <sub>6</sub>                                                         | 1          | 5.07          | 3.45           | 1                     | 3            | 2               | 0            | 549.4<br>7 | 0            | 3.98        | 1681.<br>0 | 2             | 47.73      |
| Mg <sub>7</sub> Ga <sub>2</sub> GeO <sub>12</sub>                            | 2          | 25.45         | 4.30           | 1                     | 3            | 14              | 4            | 118.9<br>4 | -2           | 1313.9<br>0 | 140.9<br>8 | 4             | 86.08      |
| Na <sub>1.57</sub> Zn <sub>0.57</sub> Al <sub>10.43</sub><br>O <sub>17</sub> | 2          | 5.62          | 3.43           | 2                     | 3            | 5               | 2            | 0.00       | -2           | 1313.9<br>0 | 140.9<br>8 | 4             | 98.30      |
| Na <sub>2</sub> GeF <sub>6</sub>                                             | 1          | 9.06          | 3.19           | 2                     | 4            | 6               | -1           | 328.1<br>6 | 0            | 0.00        | 0.00       | 0             | 243.74     |
| Na <sub>2</sub> MgAl <sub>10</sub> O <sub>17</sub>                           | 2          | 5.61          | 3.30           | 2                     | 3            | 6               | 2            | 0.00       | -2           | 1313.9<br>0 | 140.9<br>8 | 4             | 97.38      |
| Na <sub>2</sub> NbF <sub>5</sub> O                                           | 3          | 5.51          | 3.25           | 1                     | 5            | 8               | -1           | 328.1<br>6 | -2           | 1313.9<br>0 | 140.9<br>8 | 4             | 219.54     |
| Na <sub>2</sub> SiF <sub>6</sub>                                             | 1          | 8.86          | 2.74           | 2                     | 4            | 6               | -1           | 328.1<br>6 | 0            | 0.00        | 0.00       | 0             | 245.42     |
| Na <sub>3</sub> AlF <sub>6</sub>                                             | 1          | 5.60          | 2.97           | 1                     | 3            | 6               | -1           | 328.1<br>6 | 0            | 0.00        | 0.00       | 0             | 216.93     |
| Na <sub>3</sub> Li <sub>3</sub> Al <sub>2</sub> F <sub>12</sub>              | 1          | 12.12         | 2.77           | 1                     | 3            | 24              | 1            | 59.63      | -1           | 1681.0<br>0 | 328.1<br>6 | 5             | 217.27     |
| Na <sub>3</sub> Li <sub>3</sub> Sc <sub>2</sub> F <sub>12</sub>              | 1          | 12.61         | 2.70           | 1                     | 3            | 24              | 1            | 59.63      | -1           | 1681.0<br>0 | 328.1<br>6 | 5             | 215.58     |
| Na <sub>3</sub> Li <sub>3</sub> Sc <sub>2</sub> F <sub>12</sub>              | 1          | 12.61         | 2.70           | 1                     | 3            | 24              | 1            | 59.63      | -1           | 1681.0<br>0 | 328.1<br>6 | 5             | 215.58     |

|                                                    | O/F/O<br>F | lat_para_<br>b | cryst_de<br>ns | species_octahed<br>ra | valence_<br>1 | num_atomic<br>2 | valence_<br>3 | EA_3       | valence_<br>4 | IE_4        | EA_4       | num_VEPM<br>4 | AVG_E<br>A |
|----------------------------------------------------|------------|----------------|----------------|-----------------------|---------------|-----------------|---------------|------------|---------------|-------------|------------|---------------|------------|
| NaHF <sub>2</sub>                                  | 1          | 3.48           | 2.15           | 1                     | 1             | 3               | -1            | 328.1<br>6 | 0             | 0.00        | 0.00       | 0             | 195.49     |
| NaKSnF <sub>6</sub>                                | 1          | 6.00           | 3.40           | 1                     | 4             | 4               | 1             | 48.39      | -1            | 1681.0<br>0 | 328.1<br>6 | 5             | 56.31      |
| NaKSnF <sub>6</sub>                                | 1          | 6.00           | 3.40           | 1                     | 4             | 4               | 1             | 48.39      | -1            | 1681.0<br>0 | 328.1<br>6 | 5             | 241.95     |
| NaLaMgTe<br>O <sub>6</sub>                         | 2          | 5.53           | 5.60           | 1                     | 6             | 2               | 3             | 45.35      | 2             | 737.75      | 0.00       | 0             | 113.43     |
| NaLaMgW<br>O <sub>6</sub>                          | 2          | 7.82           | 6.42           | 1                     | 6             | 4               | 3             | 45.35      | 2             | 737.75      | 0.00       | 0             | 102.29     |
| Rb <sub>2</sub> HfF <sub>6</sub>                   | 1          | 6.14           | 4.90           | 1                     | 4             | 2               | -1            | 328.1<br>6 | 0             | 0.00        | 0.00       | 0             | 229.34     |
| Rb <sub>2</sub> KGaF <sub>6</sub>                  | 1          | 8.81           | 3.83           | 1                     | 3             | 8               | 1             | 48.39      | -1            | 1681.0<br>0 | 328.1<br>6 | 5             | 215.26     |
| Rb <sub>2</sub> NaAlF <sub>6</sub>                 | 1          | 8.31           | 3.88           | 1                     | 3             | 8               | 1             | 52.87      | -1            | 1681.0<br>0 | 328.1<br>6 | 5             | 215.74     |
| Rb <sub>2</sub> SiF <sub>6</sub>                   | 1          | 8.45           | 3.45           | 1                     | 4             | 8               | -1            | 328.1<br>6 | 0             | 0.00        | 0.00       | 0             | 244.09     |
| Rb <sub>2</sub> ZrF <sub>6</sub>                   | 1          | 6.16           | 3.94           | 1                     | 4             | 2               | -1            | 328.1<br>6 | 0             | 0.00        | 0.00       | 0             | 233.76     |
| Rb <sub>3</sub> Nb <sub>3</sub> OF <sub>18</sub>   | 3          | 15.53          | 3.76           | 2                     | 5             | 20              | -2            | 140.9<br>8 | -1            | 1681.0<br>0 | 328.1<br>6 | 5             | 242.50     |
| Sr <sub>2</sub> CaWO <sub>6</sub>                  | 2          | 5.77           | 5.94           | 2                     | 6             | 4               | 2             | 2.37       | -2            | 1313.9<br>0 | 140.9<br>8 | 4             | 93.63      |
| Sr <sub>2</sub> InSbO <sub>6</sub>                 | 2          | 5.73           | 6.34           | 1                     | 5             | 4               | 3             | 28.95      | -2            | 1313.9<br>0 | 140.9<br>8 | 4             | 98.50      |
| Sr <sub>2</sub> MgAl <sub>22</sub> O<br>36         | 2          | 5.58           | 3.77           | 4                     | 3             | 2               | 2             | 0.00       | -2            | 1313.9<br>0 | 140.9<br>8 | 4             | 101.35     |
| Sr <sub>2</sub> MgWO <sub>6</sub>                  | 2          | 7.95           | 6.33           | 1                     | 6             | 8               | 2             | 0.00       | -2            | 1313.9<br>0 | 140.9<br>8 | 4             | 93.39      |
| Sr <sub>2</sub> MgWO <sub>6</sub>                  | 2          | 7.95           | 6.33           | 1                     | 6             | 8               | 2             | 0.00       | -2            | 1313.9<br>0 | 140.9<br>8 | 4             | 93.39      |
| Sr <sub>2</sub> YTaO <sub>6</sub>                  | 2          | 5.86           | 6.40           | 1                     | 5             | 4               | 3             | 29.62      | -2            | 1313.9<br>0 | 140.9<br>8 | 4             | 94.77      |
| Sr <sub>2</sub> ZnMoO <sub>6</sub>                 | 2          | 7.95           | 5.71           | 1                     | 6             | 8               | 2             | 0.00       | -2            | 1313.9<br>0 | 140.9<br>8 | 4             | 92.73      |
| Sr <sub>2</sub> ZnWO <sub>6</sub>                  | 2          | 7.93           | 6.94           | 1                     | 6             | 8               | 2             | 0.00       | -2            | 1313.9<br>0 | 140.9<br>8 | 4             | 93.39      |
| Sr <sub>3</sub> Al <sub>10</sub> SiO <sub>20</sub> | 2          | 11.18          | 3.71           | 2                     | 3             | 6               | 4             | 134.0<br>7 | -2            | 1313.9<br>0 | 140.9<br>8 | 4             | 99.56      |

|                                                                         | O/F/O<br>F | lat_para_<br>b | cryst_de<br>ns | species_octahe<br>dra | valence_<br>1 | num_atomic<br>2 | valence_<br>3 | EA_<br>3   | valence_<br>4 | IE_4        | EA_<br>4   | num_VEPM<br>4 | AVG_E<br>A |
|-------------------------------------------------------------------------|------------|----------------|----------------|-----------------------|---------------|-----------------|---------------|------------|---------------|-------------|------------|---------------|------------|
| Sr <sub>3</sub> Al <sub>10</sub> SiO <sub>20</sub>                      | 2          | 11.18          | 3.71           | 2                     | 3             | 6               | 4             | 134.0<br>7 | -2            | 1313.9<br>0 | 140.9<br>8 | 4             | 99.56      |
| Sr <sub>3</sub> LiSbO <sub>6</sub>                                      | 2          | 9.77           | 5.25           | 1                     | 5             | 18              | 1             | 59.63      | -2            | 1313.9<br>0 | 140.9<br>8 | 4             | 92.76      |
| Sr <sub>3</sub> LiTaO <sub>6</sub>                                      | 2          | 9.81           | 5.83           | 1                     | 5             | 18              | 1             | 59.63      | -2            | 1313.9<br>0 | 140.9<br>8 | 4             | 86.41      |
| Sr <sub>3</sub> NaSbO <sub>6</sub>                                      | 2          | 9.76           | 5.25           | 1                     | 5             | 18              | 1             | 52.87      | -2            | 1313.9<br>0 | 140.9<br>8 | 4             | 92.14      |
| Sr <sub>4</sub> Al <sub>14</sub> O <sub>25</sub>                        | 2          | 8.49           | 3.65           | 3                     | 3             | 8               | -2            | 140.9<br>8 | 0             | 0.00        | 0.00       | 0             | 95.99      |
| SrAl <sub>12</sub> O <sub>19</sub>                                      | 2          | 5.57           | 4.20           | 3                     | 3             | 2               | -2            | 140.9<br>8 | 0             | 0.00        | 0.00       | 0             | 99.51      |
| SrGd <sub>2</sub> Al <sub>2</sub> O <sub>7</sub>                        | 2          | 3.71           | 6.94           | 1                     | 3             | 2               | 3             | 0.00       | -2            | 1313.9<br>0 | 140.9<br>8 | 4             | 89.58      |
| SrGe <sub>4</sub> O <sub>9</sub>                                        | 2          | 11.34          | 4.91           | 2                     | 4             | 3               | -2            | 140.9<br>8 | 0             | 0.00        | 0.00       | 0             | 124.94     |
| SrLa <sub>2</sub> Sc <sub>2</sub> O <sub>7</sub>                        | 2          | 5.74           | 5.53           | 1                     | 3             | 4               | 3             | 45.35      | -2            | 1313.9<br>0 | 140.9<br>8 | 4             | 93.21      |
| SrLaAlO <sub>4</sub>                                                    | 2          | 3.76           | 5.91           | 1                     | 3             | 2               | 3             | 45.35      | -2            | 1313.9<br>0 | 140.9<br>8 | 4             | 89.78      |
| SrLaGaO <sub>4</sub>                                                    | 2          | 3.84           | 6.39           | 1                     | 3             | 2               | 3             | 45.35      | -2            | 1313.9<br>0 | 140.9<br>8 | 4             | 93.63      |
| SrLaScO <sub>4</sub>                                                    | 2          | 5.75           | 5.39           | 1                     | 3             | 4               | 3             | 45.35      | -2            | 1313.9<br>0 | 140.9<br>8 | 4             | 90.29      |
| SrMgAl <sub>10</sub> O <sub>17</sub>                                    | 2          | 5.63           | 3.54           | 2                     | 3             | 2               | 2             | 0.00       | -2            | 1313.9<br>0 | 140.9<br>8 | 4             | 97.20      |
| Y <sub>3</sub> Al <sub>5</sub> O <sub>12</sub>                          | 2          | 12.01          | 4.55           | 1                     | 3             | 24              | -2            | 140.9<br>8 | 0             | 0.00        | 0.00       | 0             | 99.47      |
| YCa <sub>3</sub> (AlO) <sub>3</sub> (B<br>O <sub>3</sub> ) <sub>4</sub> | 2          | 10.39          | 3.58           | 1                     | 3             | 7               | 2             | 2.37       | 3             | 800.64      | 26.99      | 1             | 82.08      |

**Table S6. Hyper-parameter.**

|         |                                                                                                                  |
|---------|------------------------------------------------------------------------------------------------------------------|
| XGB.r   | n_estimators=66<br>learning_rate=0.09<br>Booster =" gbtree"                                                      |
| RF.r    | n_estimators=145<br>max_depth=7<br>max_features=4<br>min_sample_leaf=1<br>min_samples_split=4<br>random_state=31 |
| Lasso.r | Alpha=0.625370743                                                                                                |
| R.r     | Alpha=3                                                                                                          |
| KNN.r   | n_neighbors=3<br>Algorithm=" ball_tree"<br>Weights=" distance"                                                   |
| SVM.r   | C=159.074647<br>Epsilon=1.2138<br>Gamma=0.01<br>Kernel=" rbf"                                                    |

**Table S7. Predicted emission wavelength (nm) and the experimental (exp.) emission wavelength (nm).**

|                                                  | exp(nm) | XGB.r | %diff. | Lasso.r | %diff. | R.r | %diff. |
|--------------------------------------------------|---------|-------|--------|---------|--------|-----|--------|
| Ba <sub>2</sub> LaNbO <sub>6</sub>               | 677     | 666   | -1.62  | 696     | +2.81  | 696 | +2.81  |
| Ba <sub>2</sub> YNbO <sub>6</sub>                | 695     | 685   | -1.44  | 672     | -3.31  | 674 | -3.02  |
| Sr <sub>2</sub> LaSbO <sub>6</sub>               | 694     | 671   | -3.31  | 664     | -4.32  | 666 | -4.03  |
| Mg <sub>2</sub> TiO <sub>4</sub>                 | 657     | 695   | +5.78  | 683     | +3.96  | 684 | +4.11  |
| Ba <sub>2</sub> YSbO <sub>6</sub>                | 697     | 706   | +1.29  | 707     | +1.43  | 710 | +1.87  |
| Sr <sub>2</sub> ScSbO <sub>6</sub>               | 703     | 706   | +0.43  | 698     | -0.71  | 702 | -0.14  |
| Ca <sub>2</sub> LaSbO <sub>6</sub>               | 687     | 714   | +3.93  | 689     | +0.29  | 689 | +0.29  |
| CaYAlO <sub>4</sub>                              | 713     | 709   | -0.56  | 685     | -3.93  | 686 | -3.79  |
| K <sub>2</sub> NaGaF <sub>6</sub>                | 630     | 639   | +1.43  | 636     | +0.95  | 635 | +0.79  |
| La <sub>2</sub> MgGeO <sub>6</sub>               | 710     | 711   | +0.14  | 703     | -0.99  | 704 | -0.85  |
| Li <sub>2</sub> MgTi <sub>3</sub> O <sub>8</sub> | 680     | 682   | +0.29  | 677     | -0.44  | 679 | -0.15  |
| Na <sub>2</sub> WO <sub>2</sub> F <sub>4</sub>   | 620     | 667   | +7.58  | 634     | +2.26  | 630 | +1.61  |
| Rb <sub>2</sub> MoO <sub>2</sub> F <sub>4</sub>  | 632     | 674   | +6.65  | 637     | +0.79  | 633 | +0.16  |
| BaSiF <sub>6</sub>                               | 632     | 641   | +1.42  | 609     | -3.64  | 607 | -3.96  |
| K <sub>3</sub> SiF <sub>7</sub>                  | 633     | 640   | +1.11  | 612     | -3.32  | 609 | -3.79  |
| Ba <sub>2</sub> GdSbO <sub>6</sub>               | 687     | 681   | -0.87  | 710     | +3.35  | 711 | +3.49  |
| Sr <sub>3</sub> NaSbO <sub>6</sub>               | 695     | 712   | +2.45  | 699     | +0.58  | 698 | +0.43  |
| SrLaSc <sub>2</sub> O <sub>7</sub>               | 704     | 708   | +0.57  | 692     | -1.70  | 692 | -1.70  |
| KNaWO <sub>2</sub> F <sub>4</sub>                | 625     | 638   | +2.08  | 655     | +4.8   | 663 | +6.08  |

**Table S8. Three nearest neighbors of different phosphors in the training set and their**

|                                                  | %diff | Neighbor                                                        | Dist. | Neighbor                                                        | Dist. | Neighbor                                                                  | Dist. |
|--------------------------------------------------|-------|-----------------------------------------------------------------|-------|-----------------------------------------------------------------|-------|---------------------------------------------------------------------------|-------|
| CaYAlO <sub>4</sub>                              | -3.73 | (NH <sub>4</sub> ) <sub>2</sub> TiF <sub>6</sub>                | 1.32  | BaSnF <sub>6</sub>                                              | 1.36  | Rb <sub>2</sub> NaAlF <sub>6</sub>                                        | 1.37  |
| La <sub>2</sub> MgGeO <sub>6</sub>               | -2.19 | Na <sub>3</sub> Li <sub>3</sub> Sc <sub>2</sub> F <sub>12</sub> | 1.99  | Rb <sub>2</sub> HfF <sub>6</sub>                                | 2.01  | K <sub>2</sub> BaGe <sub>8</sub> O <sub>18</sub>                          | 2.15  |
| Sr <sub>2</sub> ScSbO <sub>6</sub>               | -1.91 | La <sub>2</sub> ZnTiO <sub>6</sub>                              | 1.4   | NaLaMgTeO <sub>6</sub>                                          | 1.43  | Na <sub>3</sub> Li <sub>3</sub> Sc <sub>2</sub> F <sub>12</sub>           | 1.46  |
| K <sub>3</sub> SiF <sub>7</sub>                  | -1.62 | Na <sub>2</sub> MgAl <sub>10</sub> O <sub>17</sub>              | 2.38  | BaGeF <sub>6</sub>                                              | 2.43  | Ba <sub>2</sub> GdNbO <sub>6</sub>                                        | 2.56  |
| Ba <sub>2</sub> YNbO <sub>6</sub>                | -1.01 | Na <sub>3</sub> Li <sub>3</sub> Sc <sub>2</sub> F <sub>12</sub> | 1.52  | Rb <sub>2</sub> HfF <sub>6</sub>                                | 1.52  | K <sub>2</sub> LiAlF <sub>6</sub>                                         | 1.78  |
| BaSiF <sub>6</sub>                               | -0.68 | Na <sub>2</sub> MgAl <sub>10</sub> O <sub>17</sub>              | 2.44  | LaTiSbO <sub>6</sub>                                            | 2.47  | BaGeF <sub>6</sub>                                                        | 2.5   |
| Ba <sub>2</sub> YSbO <sub>6</sub>                | -0.36 | Na <sub>3</sub> Li <sub>3</sub> Sc <sub>2</sub> F <sub>12</sub> | 0.63  | Rb <sub>2</sub> HfF <sub>6</sub>                                | 1.63  | K <sub>2</sub> BaGe <sub>8</sub> O <sub>18</sub>                          | 1.8   |
| SrLa <sub>2</sub> Sc <sub>2</sub> O <sub>7</sub> | -0.24 | Ba <sub>2</sub> CaWO <sub>6</sub>                               | 0.93  | BaSnF <sub>6</sub>                                              | 0.93  | KNaSiF <sub>6</sub>                                                       | 1.19  |
| Sr <sub>2</sub> LaSbO <sub>6</sub>               | -0.19 | NaLaMgTeO <sub>6</sub>                                          | 1.38  | BaLaMgNbO <sub>6</sub>                                          | 1.4   | Na <sub>1.57</sub> Zn <sub>0.57</sub> Al <sub>10.43</sub> O <sub>17</sub> | 1.41  |
| Rb <sub>2</sub> MoO <sub>2</sub> F <sub>4</sub>  | 0     | CsMoO <sub>2</sub> F <sub>3</sub>                               | 1.61  | LaTiSbO <sub>6</sub>                                            | 2.47  | BaGeF <sub>6</sub>                                                        | 2.5   |
| Li <sub>2</sub> MgTi <sub>3</sub> O <sub>8</sub> | +0.24 | Ba <sub>2</sub> LaSbO <sub>6</sub>                              | 1.42  | LaScO <sub>3</sub>                                              | 1.59  | Ba <sub>2</sub> MgWO <sub>6</sub>                                         | 1.72  |
| Ca <sub>2</sub> LaSbO <sub>6</sub>               | +0.3  | La <sub>2</sub> ZnTiO <sub>6</sub>                              | 0.8   | LaScO <sub>3</sub>                                              | 0.94  | NaLaMgTeO <sub>6</sub>                                                    | 0.97  |
| K <sub>2</sub> NaGaF <sub>6</sub>                | +0.37 | Rb <sub>2</sub> ZrF <sub>6</sub>                                | 1.53  | Cs <sub>2</sub> HfF <sub>6</sub>                                | 1.54  | Na <sub>3</sub> AlF <sub>6</sub>                                          | 1.55  |
| Sr <sub>3</sub> NaSbO <sub>6</sub>               | +0.47 | Rb <sub>2</sub> HfF <sub>6</sub>                                | 0.81  | Na <sub>3</sub> Li <sub>3</sub> Sc <sub>2</sub> F <sub>12</sub> | 0.82  | Li <sub>2</sub> MgZrO <sub>4</sub>                                        | 1.58  |
| Ba <sub>2</sub> GdSbO <sub>6</sub>               | +1.06 | K <sub>2</sub> BaGe <sub>8</sub> O <sub>18</sub>                | 1.77  | Ba <sub>2</sub> LuNbO <sub>6</sub>                              | 1.78  | Na <sub>3</sub> Li <sub>3</sub> Sc <sub>2</sub> F <sub>12</sub>           | 1.91  |
| Mg <sub>2</sub> TiO <sub>4</sub>                 | +1.92 | Cs <sub>2</sub> NaAl <sub>3</sub> F <sub>12</sub>               | 2.46  | Ca <sub>2</sub> MgWO <sub>6</sub>                               | 2.53  | CaMg <sub>2</sub> Al <sub>16</sub> O <sub>27</sub>                        | 2.62  |
| Na <sub>2</sub> WO <sub>2</sub> F <sub>4</sub>   | +1.95 | CsMoO <sub>2</sub> F <sub>3</sub>                               | 2.04  | Ca <sub>2</sub> InSbO <sub>6</sub>                              | 3.03  | Li <sub>5</sub> La <sub>3</sub> Nb <sub>2</sub> O <sub>12</sub>           | 4.34  |
| Ba <sub>2</sub> LaNbO <sub>6</sub>               | +3.88 | BaSnF <sub>6</sub>                                              | 1.02  | Ba <sub>2</sub> CaWO <sub>6</sub>                               | 1.07  | KNaSiF <sub>6</sub>                                                       | 1.09  |
| KNaWO <sub>2</sub> F <sub>4</sub>                | +6.46 | Ba <sub>2</sub> MgWO <sub>6</sub>                               | 2.55  | Rb <sub>2</sub> NaAlF <sub>6</sub>                              | 2.59  | BaTiF <sub>6</sub>                                                        | 2.59  |

**Euclidean distances.**
